# Supplementary material for: Evaluating gut microbiota profiles from archived fecal samples
Source: Springer Nature journal article supplement (doi:10.1186/s12876-018-0896-6), 2018-11-08
Supplement: MOESM1 [file 16259802]

Additional File 1:

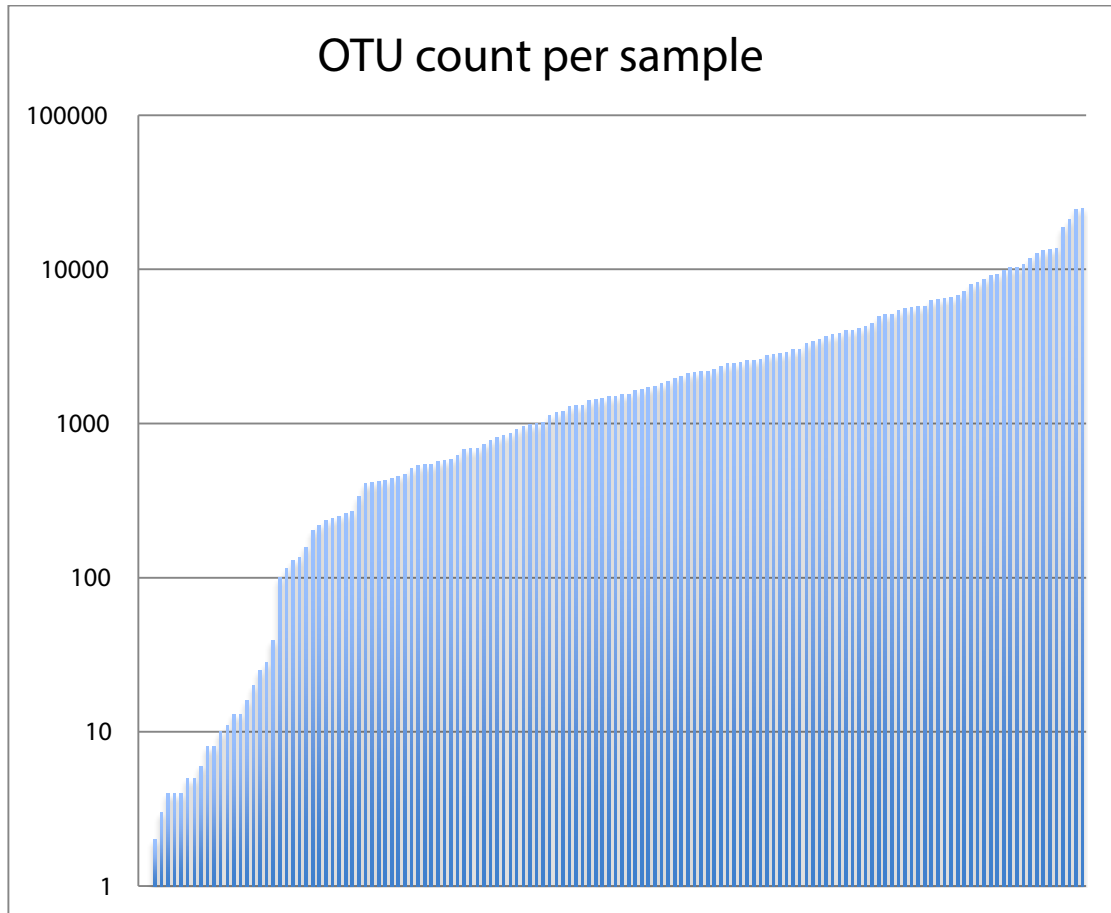

Figure s1: Distribution of OUT counts in all samples analysed
