# Supplementary material for: Evaluating gut microbiota profiles from archived fecal samples
Source: Springer Nature journal article supplement (doi:10.1186/s12876-018-0896-6), 2018-11-08
Supplement: MOESM6 [file 16259802]

**Table s6: Differences in microbial composition between buffered and archived samples**

| OTU   | logFC  | se    | pvalues  | adjPvalues |
|-------|--------|-------|----------|------------|
| Otu04 | -1,232 | 0,201 | 8,23E-10 | 2,55E-08   |
| Otu11 | 1,729  | 0,296 | 5,08E-09 | 7,87E-08   |
| Otu18 | 1,853  | 0,370 | 5,57E-07 | 5,76E-06   |
| Otu14 | -1,526 | 0,333 | 4,64E-06 | 3,59E-05   |
| Otu05 | -0,816 | 0,197 | 3,31E-05 | 2,05E-04   |
| Otu09 | -0,755 | 0,273 | 5,68E-03 | 2,52E-02   |
| Otu16 | 0,846  | 0,306 | 5,69E-03 | 2,52E-02   |
| Otu21 | 0,980  | 0,372 | 8,37E-03 | 3,24E-02   |
| Otu17 | -0,869 | 0,340 | 1,06E-02 | 3,67E-02   |
| Otu12 | 0,638  | 0,256 | 1,26E-02 | 3,92E-02   |
| Otu19 | 0,730  | 0,303 | 1,58E-02 | 4,45E-02   |
| Otu22 | -1,381 | 0,591 | 1,94E-02 | 5,02E-02   |
| Otu28 | 1,132  | 0,534 | 3,41E-02 | 8,13E-02   |
| Otu32 | -1,394 | 0,747 | 6,19E-02 | 1,28E-01   |
| Otu42 | 1,618  | 0,858 | 5,94E-02 | 1,28E-01   |
| Otu06 | -0,357 | 0,203 | 7,89E-02 | 1,53E-01   |
| Otu07 | 1,442  | 0,917 | 1,16E-01 | 2,11E-01   |
| Otu23 | 0,858  | 0,607 | 1,58E-01 | 2,71E-01   |
| Otu08 | 0,353  | 0,256 | 1,68E-01 | 2,74E-01   |
| Otu24 | 0,337  | 0,301 | 2,62E-01 | 4,06E-01   |
| Otu02 | -0,774 | 0,822 | 3,46E-01 | 5,11E-01   |
| Otu29 | -0,858 | 1,047 | 4,13E-01 | 5,81E-01   |
| Otu03 | -0,531 | 0,796 | 5,05E-01 | 6,26E-01   |
| Otu13 | 0,171  | 0,249 | 4,93E-01 | 6,26E-01   |
| Otu31 | 0,553  | 0,775 | 4,75E-01 | 6,26E-01   |
| Otu27 | -0,323 | 0,761 | 6,71E-01 | 8,00E-01   |
| Otu43 | 0,204  | 0,684 | 7,65E-01 | 8,79E-01   |
| Otu01 | -0,107 | 0,713 | 8,81E-01 | 9,42E-01   |
| Otu10 | -0,038 | 0,229 | 8,68E-01 | 9,42E-01   |
| Otu15 | 0,032  | 0,298 | 9,14E-01 | 9,45E-01   |
| Otu20 | 0,015  | 0,344 | 9,64E-01 | 9,64E-01   |
| Otu26 | NA     | NA    | NA       | NA         |
| Otu34 | NA     | NA    | NA       | NA         |
| Otu36 | NA     | NA    | NA       | NA         |
| Otu52 | NA     | NA    | NA       | NA         |
