# Supplementary material for: Evaluating gut microbiota profiles from archived fecal samples
Source: Springer Nature journal article supplement (doi:10.1186/s12876-018-0896-6), 2018-11-08
Supplement: MOESM7 [file 16259802]

**Table S7: Statistical differences in microbial composition between fresh frozen directly and fresh frozen after 48h in room temperature**

| OTU   | .logFC | se    | pvalues | adjPvalues |
|-------|--------|-------|---------|------------|
| Otu32 | -0,618 | 0,647 | 0,339   | 0,994      |
| Otu22 | -0,504 | 0,959 | 0,600   | 0,994      |
| Otu17 | -0,415 | 0,603 | 0,492   | 0,994      |
| Otu05 | -0,336 | 0,623 | 0,590   | 0,994      |
| Otu02 | -0,307 | 0,608 | 0,614   | 0,994      |
| Otu13 | -0,247 | 0,679 | 0,716   | 0,994      |
| Otu12 | -0,237 | 0,848 | 0,780   | 0,994      |
| Otu15 | -0,203 | 0,850 | 0,811   | 0,994      |
| Otu06 | -0,192 | 0,682 | 0,778   | 0,994      |
| Otu09 | -0,159 | 0,934 | 0,865   | 0,994      |
| Otu03 | -0,152 | 0,594 | 0,798   | 0,994      |
| Otu01 | -0,139 | 0,414 | 0,736   | 0,994      |
| Otu04 | -0,116 | 0,958 | 0,903   | 0,994      |
| Otu07 | -0,102 | 0,631 | 0,871   | 0,994      |
| Otu10 | -0,090 | 0,642 | 0,889   | 0,994      |
| Otu08 | -0,063 | 0,898 | 0,944   | 0,994      |
| Otu14 | -0,009 | 0,440 | 0,985   | 0,994      |
| Otu11 | -0,007 | 0,902 | 0,994   | 0,994      |
| Otu19 | 0,221  | 0,496 | 0,656   | 0,994      |
| Otu18 | 0,228  | 0,518 | 0,659   | 0,994      |
| Otu24 | 0,354  | 0,724 | 0,625   | 0,994      |
| Otu21 | 0,464  | 0,505 | 0,358   | 0,994      |
| Otu16 | 0,637  | 0,758 | 0,401   | 0,994      |
| Otu28 | 0,781  | 0,921 | 0,396   | 0,994      |
| Otu20 | 1,259  | 0,851 | 0,139   | 0,994      |
