# Supplementary material for: Evaluating gut microbiota profiles from archived fecal samples
Source: BMC Gastroenterol. 2018 Nov 8;18:171. doi: 10.1186/s12876-018-0896-6 (PMC6225565; doi:10.1186/s12876-018-0896-6)
Supplement: Supplementary file 5 — Beta diversity measurements. (XLSX 126 kb) [file 12876_2018_896_MOESM5_ESM.xlsx]

## Sheet: Bray-Curtis
	FIT_1	FIT_10	FIT_11	FIT_12	FIT_14	FIT_15	FIT_16	FIT_17	FIT_18	FIT_19	FIT_2	FIT_20	FIT_21	FIT_22	FIT_24	FIT_25	FIT_26	FIT_27	FIT_28	FIT_29	FIT_3	FIT_30	FIT_31	FIT_32	FIT_34	FIT_35	FIT_36	FIT_37	FIT_38	FIT_4	FIT_40	FIT_41	FIT_42	FIT_43	FIT_44	FIT_45	FIT_46	FIT_47	FIT_48	FIT_49	FIT_5	FIT_50	FIT_6	FIT_8	FIT_9	Fresh_0103	Fresh_0201	Fresh_0203	Fresh_0401
FIT_1
FIT_10	0.855904
FIT_11	0.926402	0.900538
FIT_12	0.873180	0.806896	0.880222
FIT_14	0.893224	0.831028	0.872876	0.898476
FIT_15	0.873134	0.898644	0.932088	0.887796	0.945968
FIT_16	0.898614	0.870378	0.894928	0.792798	0.889924	0.917850
FIT_17	0.914372	0.889014	0.893306	0.916642	0.937206	0.914822	0.949136
FIT_18	0.889812	0.863756	0.829638	0.828032	0.897074	0.897534	0.810864	0.914938
FIT_19	0.909098	0.848926	0.909744	0.872560	0.878538	0.876572	0.926340	0.852024	0.924334
FIT_2	0.931132	0.896780	0.878282	0.879394	0.967104	0.955510	0.907970	0.890894	0.852802	0.899746
FIT_20	0.984176	0.972108	0.969058	0.994696	0.939944	0.972938	0.964356	0.971030	0.973998	0.978430	0.990724
FIT_21	0.917818	0.860144	0.905702	0.842336	0.978780	0.899820	0.931150	0.906540	0.796316	0.891118	0.905160	0.973184
FIT_22	0.923344	0.860068	0.813196	0.906284	0.863378	0.905576	0.854692	0.902980	0.843174	0.872864	0.866848	0.963694	0.886194
FIT_24	0.818566	0.840320	0.851984	0.822200	0.936722	0.894536	0.889770	0.819672	0.835334	0.824750	0.923852	0.965320	0.861398	0.841964
FIT_25	0.908014	0.895914	0.889972	0.808612	0.911906	0.910634	0.881090	0.959534	0.829014	0.920190	0.940676	0.989118	0.862236	0.940890	0.887872
FIT_26	0.908916	0.848048	0.908286	0.829268	0.900144	0.890934	0.921120	0.875724	0.813096	0.849360	0.871592	0.986494	0.799756	0.864108	0.883046	0.920902
FIT_27	0.966230	0.873836	0.961412	0.840324	0.939916	0.988274	0.858068	0.955834	0.958478	0.901900	0.927028	0.998086	0.977674	0.964514	0.954190	0.958782	0.947576
FIT_28	0.931316	0.889054	0.925066	0.893748	0.889718	0.953896	0.931804	0.954998	0.926218	0.865584	0.941382	0.976914	0.934312	0.933734	0.931316	0.916064	0.924008	0.946638
FIT_29	0.901596	0.834238	0.923842	0.855548	0.885588	0.893658	0.899844	0.942624	0.913526	0.821458	0.947798	0.996530	0.885912	0.916186	0.904222	0.848754	0.918200	0.942434	0.894104
FIT_3	0.913524	0.858104	0.813648	0.860864	0.937190	0.884916	0.852116	0.926628	0.845314	0.932938	0.813430	0.962132	0.897642	0.839016	0.908508	0.927534	0.923190	0.977962	0.924884	0.874038
FIT_30	0.953502	0.963322	0.937952	0.936396	0.977944	0.950340	0.947524	0.972340	0.972296	0.945270	0.950886	0.990696	0.947058	0.960684	0.973724	0.943866	0.921142	0.978434	0.968906	0.930374	0.951422
FIT_31	0.927714	0.947646	0.951144	0.911980	0.949696	0.916616	0.889184	0.958386	0.919184	0.963868	0.944128	0.991044	0.936638	0.915016	0.914844	0.931102	0.959726	0.983672	0.960468	0.890362	0.894912	0.970598
FIT_32	0.932750	0.920404	0.941054	0.900554	0.962894	0.929396	0.912340	0.937556	0.905792	0.916554	0.916586	0.992758	0.908648	0.945400	0.900876	0.925504	0.901718	0.953402	0.937186	0.916074	0.931292	0.992648	0.959272
FIT_34	0.946680	0.922692	0.920418	0.905358	0.978860	0.933636	0.917954	0.934088	0.886230	0.855612	0.922220	0.984400	0.862596	0.872544	0.853622	0.927410	0.886154	0.956748	0.972662	0.937836	0.870048	0.950776	0.900158	0.923412
FIT_35	0.863272	0.856836	0.886404	0.911548	0.834634	0.922976	0.870612	0.897822	0.876836	0.911328	0.915232	0.979552	0.954214	0.903308	0.939150	0.947992	0.917378	0.963984	0.924998	0.911930	0.896076	0.963356	0.950180	0.943534	0.968354
FIT_36	0.951218	0.924034	0.981664	0.956586	0.985170	0.948316	0.964200	0.935926	0.880802	0.981030	0.949496	0.995500	0.873476	0.956388	0.961284	0.964122	0.932554	0.979006	0.954148	0.974526	0.940996	0.975684	0.973884	0.971066	0.973284	0.981742
FIT_37	0.954768	0.938998	0.921780	0.928212	0.917018	0.944732	0.948972	0.927014	0.936516	0.947572	0.962504	0.980702	0.928940	0.903486	0.940118	0.958612	0.925174	0.980812	0.924438	0.971072	0.933580	0.984112	0.937064	0.965872	0.961532	0.908548	0.980882
FIT_38	0.920734	0.880276	0.864152	0.935984	0.882860	0.917488	0.880078	0.935580	0.876986	0.952310	0.919688	0.986778	0.947448	0.872114	0.923744	0.949360	0.896204	0.980722	0.953316	0.975346	0.902160	0.976626	0.937116	0.926990	0.906244	0.849116	0.985528	0.931574
FIT_4	0.940392	0.815820	0.924086	0.905820	0.911304	0.907160	0.862338	0.877026	0.780070	0.912716	0.910164	0.986428	0.927082	0.828176	0.880286	0.897656	0.880978	0.951760	0.971866	0.915840	0.898112	0.948768	0.920890	0.940372	0.923444	0.920344	0.938570	0.978772	0.920558
FIT_40	0.901770	0.881616	0.949916	0.858736	0.876012	0.918908	0.959002	0.847484	0.961326	0.793468	0.908000	0.992736	0.883944	0.944040	0.865296	0.935078	0.867828	0.870024	0.895120	0.828748	0.930260	0.933846	0.950908	0.950208	0.904244	0.905468	0.970218	0.935436	0.975102	0.949938
FIT_41	0.901142	0.868052	0.892212	0.796870	0.923108	0.890662	0.842150	0.917188	0.834900	0.881490	0.863180	0.961694	0.837182	0.866862	0.847538	0.833654	0.834968	0.912618	0.853454	0.851416	0.864672	0.919978	0.920750	0.891840	0.889388	0.927262	0.942058	0.921114	0.945674	0.896502	0.857190
FIT_42	0.889936	0.869912	0.796752	0.849786	0.881052	0.924010	0.858360	0.866530	0.728798	0.870610	0.793080	0.935426	0.884622	0.733772	0.828534	0.913322	0.836578	0.960936	0.918140	0.902362	0.785158	0.946298	0.937232	0.901510	0.877002	0.866832	0.933162	0.914190	0.868928	0.808132	0.903694	0.854594
FIT_43	0.919976	0.833228	0.792758	0.741716	0.854536	0.867240	0.724042	0.833036	0.814342	0.881842	0.851228	0.922304	0.871644	0.793504	0.811214	0.911072	0.885214	0.854118	0.924402	0.907506	0.802466	0.955180	0.913962	0.896168	0.908972	0.864118	0.966374	0.893638	0.864858	0.832978	0.914006	0.805092	0.783304
FIT_44	0.870918	0.854296	0.875626	0.818394	0.896226	0.894710	0.842210	0.877740	0.815638	0.761576	0.904160	0.965800	0.866410	0.868082	0.725424	0.848176	0.854928	0.956216	0.906490	0.769474	0.882864	0.930964	0.873066	0.897798	0.849182	0.944892	0.960830	0.972818	0.942650	0.876198	0.845056	0.797766	0.848282	0.864300
FIT_45	0.924426	0.942570	0.937402	0.869730	0.958046	0.910866	0.892754	0.978502	0.850872	0.921572	0.930934	0.984030	0.907368	0.939562	0.923234	0.883170	0.917390	0.948476	0.963462	0.848134	0.862382	0.931394	0.890698	0.951644	0.903582	0.967284	0.998350	0.974776	0.955344	0.892316	0.932026	0.835434	0.899356	0.906180	0.776220
FIT_46	0.871638	0.834512	0.834218	0.855652	0.868478	0.872822	0.805222	0.904964	0.775584	0.944156	0.898894	0.997174	0.900074	0.828880	0.841100	0.880398	0.884106	0.975624	0.919640	0.901714	0.864142	0.961750	0.900648	0.902436	0.911768	0.823936	0.968144	0.923512	0.841658	0.857706	0.918314	0.885218	0.825108	0.777668	0.826990	0.848446
FIT_47	0.926984	0.863470	0.913190	0.892878	0.952560	0.943294	0.922250	0.913272	0.884578	0.885778	0.911816	0.983422	0.875398	0.930412	0.891482	0.921272	0.927290	0.937684	0.890834	0.898074	0.919182	0.962746	0.923888	0.905018	0.894974	0.956912	0.923314	0.979532	0.940832	0.936906	0.897572	0.886800	0.904898	0.914750	0.884224	0.952194	0.913954
FIT_48	0.941108	0.906714	0.964710	0.899438	0.994454	0.916456	0.855658	0.928066	0.810962	0.928756	0.878780	0.991554	0.823794	0.921788	0.879946	0.897234	0.900168	0.976100	0.956540	0.935906	0.923758	0.980906	0.912752	0.825158	0.921558	0.956556	0.875120	0.969866	0.952106	0.878012	0.955470	0.869618	0.865324	0.874570	0.873062	0.908538	0.867172	0.871100
FIT_49	0.958202	0.953040	0.962566	0.969790	0.886824	0.944736	0.965788	0.905094	0.971758	0.929476	0.961020	0.970860	0.972532	0.961362	0.928904	0.986326	0.946782	0.983656	0.965536	0.984186	0.951762	0.992228	0.966140	0.950600	0.944676	0.937350	1.000000	0.949998	0.942052	0.992954	0.940482	0.958632	0.966556	0.936116	0.959840	0.976388	0.953304	0.955472	0.989830
FIT_5	0.914972	0.879458	0.887930	0.753604	0.899576	0.919168	0.771382	0.941922	0.834598	0.898790	0.946508	0.996256	0.892980	0.888438	0.870954	0.872634	0.920828	0.848410	0.931122	0.894492	0.920682	0.985790	0.897458	0.898952	0.902948	0.896594	0.982876	0.931632	0.926814	0.879182	0.907822	0.868106	0.836164	0.726590	0.854010	0.877500	0.803210	0.901416	0.875096	0.987514
FIT_50	0.901924	0.888422	0.926848	0.833558	0.937294	0.900918	0.932496	0.901040	0.932638	0.832976	0.906310	0.990964	0.865314	0.876458	0.902832	0.902588	0.876690	0.944574	0.919428	0.817504	0.882002	0.922022	0.918352	0.924344	0.907762	0.950092	0.952226	0.951034	0.956576	0.916162	0.861702	0.826804	0.849114	0.854698	0.800134	0.875914	0.900118	0.916754	0.908538	0.949102	0.908806
FIT_6	0.976750	0.852638	0.918012	0.950104	0.953438	0.974128	0.966888	0.953580	0.962914	0.916970	0.945766	0.983082	0.977680	0.928298	0.938110	0.976878	0.893152	0.926312	0.897232	0.896010	0.945452	0.939352	0.923162	0.968892	0.963364	0.971556	0.984120	0.979106	0.951140	0.957920	0.939464	0.918646	0.956786	0.968020	0.903394	0.958412	0.931762	0.946832	0.967660	0.972042	0.979748	0.931700
FIT_8	0.885464	0.762370	0.871056	0.851520	0.831642	0.907662	0.898722	0.918310	0.837342	0.902966	0.898324	0.985760	0.876404	0.908010	0.852658	0.906188	0.881920	0.847810	0.870666	0.851414	0.899856	0.948026	0.949848	0.876086	0.920002	0.880328	0.895258	0.954500	0.867358	0.874802	0.803666	0.796294	0.838500	0.866502	0.862822	0.904314	0.827598	0.870440	0.868668	0.960448	0.862672	0.893288	0.918054
FIT_9	0.927306	0.940544	0.850874	0.935018	0.904338	0.923904	0.908620	0.869946	0.785010	0.935510	0.890182	0.857434	0.929464	0.797428	0.893096	0.973768	0.856186	0.987392	0.931112	0.926804	0.835618	0.957402	0.930936	0.973236	0.905576	0.929694	0.950104	0.944404	0.939542	0.834742	0.931284	0.894958	0.738010	0.838336	0.893792	0.910056	0.861208	0.934978	0.949224	0.953046	0.955230	0.867372	0.939258	0.939878
Fresh_0103	0.957550	0.945792	0.869520	0.918478	0.917230	0.935908	0.859632	0.942722	0.907694	0.917940	0.924852	0.947442	0.928202	0.839040	0.918516	0.919654	0.911256	0.978516	0.908984	0.943126	0.855626	0.955062	0.926560	0.968818	0.872234	0.912440	0.985414	0.903942	0.896896	0.955562	0.953750	0.859454	0.880968	0.838838	0.924472	0.963654	0.885484	0.930236	0.957532	0.889330	0.904996	0.906716	0.945306	0.926190	0.870004
Fresh_0201	0.881852	0.822480	0.839550	0.746554	0.907496	0.887930	0.853512	0.928190	0.773742	0.880982	0.880722	0.989180	0.792230	0.877694	0.830278	0.824842	0.822126	0.951738	0.858274	0.843392	0.798072	0.918712	0.909390	0.878876	0.878672	0.906792	0.889938	0.925184	0.904696	0.862602	0.862514	0.760446	0.822348	0.860726	0.778102	0.801966	0.813898	0.834458	0.811614	0.972590	0.868314	0.791390	0.938892	0.768696	0.859528	0.871362
Fresh_0203	0.915638	0.924106	0.865284	0.886830	0.890550	0.925108	0.904216	0.895464	0.906778	0.914144	0.920510	0.982684	0.939166	0.905174	0.933354	0.915260	0.943922	0.971584	0.922098	0.905958	0.851090	0.966422	0.933384	0.943874	0.936078	0.896862	0.929126	0.918086	0.935786	0.909090	0.909106	0.927894	0.849682	0.884848	0.906078	0.941296	0.869376	0.950628	0.936466	0.951516	0.899202	0.814352	0.975948	0.890568	0.874766	0.890602	0.699270
Fresh_0401	0.865670	0.889284	0.895050	0.915382	0.864400	0.886282	0.921544	0.922730	0.875506	0.960252	0.961114	0.976456	0.944384	0.944166	0.903784	0.892518	0.953366	0.976610	0.949286	0.926866	0.921812	0.982026	0.925612	0.948724	0.940034	0.856702	0.973872	0.917546	0.916292	0.942152	0.936110	0.930608	0.891260	0.903552	0.951352	0.956386	0.832916	0.943984	0.951230	0.944896	0.919464	0.964180	0.964024	0.900832	0.960224	0.947648	0.901380	0.874362
Fresh_0403	0.909100	0.880312	0.906028	0.842592	0.912616	0.903740	0.864344	0.889136	0.938050	0.935440	0.941030	0.995242	0.966858	0.932146	0.944094	0.993482	0.951910	0.859900	0.965142	0.969616	0.917536	0.987042	0.949272	0.971998	0.964720	0.908570	0.955466	0.930876	0.927710	0.945930	0.946408	0.954702	0.893258	0.805720	0.981076	0.967404	0.897374	0.963014	0.954882	0.916440	0.858402	0.946366	0.968528	0.926286	0.924074	0.928786	0.939780	0.929226	0.803256
Fresh_0501	0.898062	0.845010	0.783732	0.821148	0.799288	0.935932	0.869442	0.872942	0.849892	0.857158	0.881456	0.986142	0.914066	0.770704	0.885050	0.915484	0.861272	0.935876	0.913390	0.879452	0.839992	0.963236	0.902036	0.885592	0.886538	0.844898	0.974298	0.910684	0.821852	0.869842	0.857098	0.870998	0.804490	0.769182	0.881286	0.936964	0.849108	0.909594	0.934314	0.967180	0.844638	0.891096	0.954938	0.833584	0.900204	0.827982	0.819502	0.848210	0.904362
Fresh_0503	0.899806	0.856906	0.762050	0.845616	0.809754	0.919104	0.884490	0.883746	0.867098	0.875326	0.895496	0.985066	0.904800	0.770528	0.868208	0.935178	0.863954	0.952540	0.928042	0.875482	0.814056	0.974954	0.895062	0.861196	0.883508	0.863564	0.980384	0.923992	0.850004	0.885666	0.866704	0.866712	0.794442	0.768690	0.875210	0.931092	0.864420	0.924312	0.928732	0.936062	0.832414	0.868262	0.960388	0.824164	0.881506	0.838896	0.824736	0.833840	0.899064
Fresh_0601	0.879884	0.797230	0.808280	0.817008	0.864508	0.863430	0.805856	0.869092	0.797880	0.882876	0.828790	0.990316	0.877352	0.812622	0.810230	0.897636	0.854580	0.935232	0.948220	0.844310	0.822692	0.944208	0.875084	0.852072	0.889990	0.853552	0.963142	0.918682	0.823200	0.833400	0.889860	0.842726	0.788264	0.743932	0.776054	0.843224	0.688088	0.925652	0.861136	0.944472	0.813036	0.859922	0.902140	0.781538	0.881032	0.875150	0.786164	0.851330	0.850960
Fresh_0603	0.884812	0.839876	0.829276	0.826572	0.876722	0.851604	0.803996	0.857540	0.799766	0.885494	0.840146	0.995100	0.868958	0.804248	0.812356	0.905220	0.873512	0.950824	0.948466	0.818516	0.808688	0.957722	0.866086	0.848682	0.890886	0.867588	0.925314	0.908258	0.849622	0.839242	0.886014	0.851476	0.781220	0.737436	0.771176	0.840546	0.707060	0.923566	0.834462	0.939222	0.817368	0.821402	0.941876	0.787590	0.855034	0.843786	0.781468	0.828096	0.868000
Fresh_0701	0.873558	0.783560	0.732906	0.817826	0.811542	0.859746	0.786562	0.874370	0.770464	0.881002	0.860112	0.958960	0.867676	0.818460	0.805820	0.852836	0.886696	0.942198	0.922112	0.857790	0.770986	0.948786	0.892528	0.851440	0.909090	0.796648	0.963712	0.906406	0.811160	0.834160	0.894896	0.839280	0.757144	0.723414	0.824536	0.871020	0.727882	0.903426	0.876144	0.922906	0.813182	0.880168	0.973442	0.776744	0.837840	0.846134	0.767752	0.858550	0.858658
Fresh_0703	0.863002	0.794754	0.748472	0.831034	0.806696	0.870604	0.794286	0.865356	0.782642	0.889600	0.858722	0.946272	0.879130	0.830544	0.809734	0.872044	0.888840	0.930552	0.932008	0.845850	0.770420	0.950542	0.882642	0.862446	0.907966	0.812604	0.956168	0.915518	0.816140	0.832966	0.887290	0.848384	0.769036	0.718440	0.823976	0.863832	0.728064	0.884380	0.886114	0.920686	0.794510	0.885826	0.967506	0.785204	0.834216	0.841452	0.776994	0.871158	0.871464
Fresh_0801	0.907438	0.836484	0.847590	0.887934	0.870884	0.898962	0.900048	0.958646	0.888824	0.942940	0.957948	0.979810	0.929366	0.881958	0.896564	0.881388	0.900450	0.988786	0.900114	0.936858	0.876510	0.976102	0.892398	0.933956	0.883140	0.870678	0.986226	0.943458	0.883098	0.946226	0.963186	0.898460	0.902106	0.888446	0.904318	0.942270	0.761008	0.937848	0.946066	0.877244	0.915522	0.889018	0.918034	0.875850	0.851634	0.780332	0.841104	0.839436	0.844976
Fresh_0803	0.906838	0.868988	0.816134	0.887598	0.832912	0.924626	0.906670	0.912414	0.897356	0.884818	0.968622	0.977914	0.944008	0.861070	0.886902	0.909768	0.889004	0.969228	0.883976	0.938234	0.910176	0.976330	0.910384	0.948478	0.895566	0.874738	0.978126	0.927850	0.887606	0.962286	0.931376	0.899636	0.878422	0.910430	0.872276	0.937292	0.816498	0.944596	0.961808	0.836192	0.907430	0.875414	0.919204	0.890874	0.867326	0.740470	0.826194	0.842280	0.849474
Fresh_1001	0.890272	0.843404	0.893958	0.842754	0.887246	0.888110	0.879974	0.939248	0.859252	0.904624	0.927910	0.984356	0.871916	0.888060	0.869478	0.904944	0.877206	0.955374	0.936496	0.858216	0.855932	0.956456	0.943344	0.901884	0.897950	0.899674	0.988734	0.933122	0.898680	0.936778	0.895058	0.841624	0.856176	0.889128	0.846142	0.917934	0.863050	0.902060	0.918516	0.897226	0.913516	0.864900	0.925104	0.866442	0.915092	0.757056	0.794636	0.891506	0.882104
Fresh_1003	0.944040	0.912608	0.934076	0.895438	0.938284	0.923996	0.931678	0.958004	0.910914	0.908998	0.963232	0.985528	0.893450	0.901332	0.920958	0.924342	0.906800	0.974866	0.957558	0.865812	0.885388	0.949520	0.969056	0.962312	0.941126	0.942536	0.986572	0.958544	0.954818	0.967116	0.904636	0.902748	0.879946	0.928748	0.904198	0.937292	0.954812	0.953242	0.964772	0.922146	0.934602	0.873884	0.976862	0.952454	0.922160	0.784042	0.867686	0.905890	0.979366
Fresh_1010	0.916600	0.905082	0.879562	0.906304	0.897378	0.934466	0.855710	0.933134	0.921166	0.863044	0.953090	0.947110	0.927714	0.849628	0.898880	0.898658	0.887364	0.951842	0.858334	0.920280	0.886552	0.938060	0.939506	0.956164	0.873296	0.906536	0.982824	0.880536	0.906748	0.957378	0.905808	0.815040	0.886884	0.875914	0.878338	0.953842	0.884144	0.893036	0.964284	0.889780	0.900968	0.849890	0.915876	0.899650	0.891514	0.517344	0.824990	0.868488	0.944744
NorCap-T00-1005	0.992542	0.990540	0.973634	0.992754	0.989646	0.983236	0.960216	0.987264	0.975646	0.981688	0.961704	0.994570	0.983916	0.965698	0.993666	0.983946	0.992778	0.996224	0.978784	0.984538	0.962068	0.991082	0.964882	0.998346	0.987568	0.966394	0.994026	0.979460	0.971402	0.976578	0.990672	0.987184	0.965288	0.968746	0.988314	0.995026	0.969676	0.978850	0.993730	0.979680	0.982796	0.967974	0.977416	0.995292	0.972494	0.962000	0.994806	0.966418	0.991920
NorCap-T00-414	0.880222	0.822776	0.912614	0.857606	0.944992	0.818618	0.867886	0.891624	0.827562	0.913206	0.914612	0.972892	0.814646	0.917818	0.816980	0.907422	0.851624	0.973208	0.920640	0.905944	0.867348	0.972556	0.916886	0.837590	0.914478	0.901996	0.883888	0.938946	0.903202	0.910416	0.896978	0.854822	0.844208	0.835930	0.862576	0.921854	0.813618	0.855542	0.751732	0.927294	0.887644	0.877574	0.977158	0.788146	0.915924	0.919054	0.722072	0.888298	0.893170
NorCap-T00-415	0.889584	0.769150	0.925242	0.840254	0.933368	0.892456	0.847286	0.825094	0.784476	0.905460	0.905514	0.970480	0.837454	0.939300	0.874990	0.875918	0.881474	0.919070	0.900652	0.862468	0.843786	0.973642	0.913606	0.908434	0.932540	0.910928	0.896538	0.945550	0.932496	0.835664	0.909166	0.854590	0.858046	0.827794	0.831130	0.875226	0.831068	0.867576	0.835748	0.983484	0.827888	0.911116	0.948656	0.863114	0.892506	0.941854	0.825738	0.902994	0.903642
NorCap-T00-422	0.899200	0.905432	0.924964	0.887600	0.926088	0.895176	0.868308	0.936644	0.883158	0.940882	0.940806	0.994930	0.900100	0.911878	0.872832	0.917008	0.914130	0.987942	0.985118	0.897872	0.920404	0.978376	0.879378	0.909082	0.900010	0.947576	0.994094	0.954680	0.921400	0.915994	0.953326	0.918358	0.932358	0.865430	0.758054	0.862472	0.794484	0.931798	0.884468	0.895702	0.864368	0.864174	0.965280	0.897474	0.920884	0.811320	0.881238	0.925230	0.933598
NorCap-T00-423	0.883186	0.802624	0.895780	0.855614	0.932932	0.884004	0.882736	0.923918	0.811924	0.927850	0.914542	0.992088	0.818176	0.907910	0.882508	0.903838	0.862442	0.977698	0.940110	0.891656	0.841046	0.980116	0.906788	0.861244	0.895068	0.887322	0.894700	0.959872	0.898940	0.877698	0.941428	0.876438	0.832662	0.867708	0.852594	0.848284	0.759332	0.839970	0.809906	0.962144	0.876994	0.863510	0.975114	0.822762	0.892184	0.933384	0.703676	0.923608	0.903670
NorCap-T00-424	0.982068	0.960566	0.941012	0.941766	0.984786	0.961918	0.949750	0.971782	0.946438	0.964690	0.954754	0.979558	0.931138	0.963192	0.952226	0.967896	0.981128	0.991058	0.986178	0.957014	0.957350	0.966954	0.954448	0.962246	0.948354	0.960884	0.979218	0.980546	0.951612	0.956754	0.972410	0.954818	0.959548	0.941094	0.973926	0.941274	0.953244	0.960544	0.973480	0.964154	0.948170	0.970182	0.962682	0.950900	0.944172	0.953878	0.938804	0.955570	0.970960
NorCap-T00-984	0.926914	0.853004	0.913150	0.827316	0.890928	0.927766	0.857788	0.951786	0.932418	0.958120	0.973372	0.992896	0.969444	0.948446	0.966674	0.919892	0.925462	0.888648	0.962972	0.981986	0.957634	0.982492	0.944286	0.974012	0.935000	0.883466	0.994128	0.939840	0.896654	0.986892	0.958104	0.966802	0.951768	0.850552	0.963732	0.979644	0.849314	0.987144	0.988186	0.889280	0.867868	0.891262	0.963946	0.931030	0.949110	0.813156	0.888608	0.851378	0.831442
NorCap-T01-1708	0.953988	0.979488	0.967850	0.937292	0.955034	0.955172	0.968270	0.917826	0.969886	0.925624	0.922766	0.989778	0.941942	0.909598	0.969412	0.979504	0.918994	0.986990	0.994876	0.939324	0.940818	0.983526	0.926084	0.965028	0.946024	0.951032	0.967558	0.961136	0.986990	0.957178	0.949996	0.960574	0.919262	0.939492	0.931354	0.965558	0.952870	0.973548	0.951992	0.977800	0.968496	0.889246	0.995206	0.982640	0.917560	0.946326	0.958352	0.916372	0.959226
NorCap-T01-1710	0.951004	0.978436	0.964968	0.966688	0.962032	0.946076	0.954190	0.930782	0.969384	0.966300	0.965900	0.984246	0.970054	0.929942	0.976402	0.972826	0.977934	0.983732	0.970858	0.951900	0.932904	0.989722	0.948016	0.991884	0.967894	0.956482	0.952644	0.951338	0.986592	0.940730	0.962250	0.947642	0.933386	0.953184	0.971602	0.986912	0.965222	0.967388	0.969246	0.981126	0.965996	0.936474	0.979344	0.987340	0.922654	0.953714	0.972490	0.931628	0.942152
NorCap-T01-1726	0.984852	0.986884	0.951556	0.966618	0.954850	0.977884	0.968272	0.976152	0.962284	0.967266	0.981250	0.995184	0.981118	0.967802	0.971158	0.953680	0.986162	0.994396	0.967846	0.975674	0.987588	0.983384	0.969194	0.975666	0.974092	0.963282	0.994768	0.940128	0.975422	0.982734	0.981710	0.977894	0.955872	0.952912	0.979684	0.987956	0.957208	0.977338	0.976346	0.983154	0.954474	0.968030	0.971728	0.977262	0.987478	0.961676	0.960194	0.943606	0.961386
NorCap-T01-1736	0.954760	0.972074	0.994910	0.986012	0.973074	0.956232	0.966144	0.937080	0.980620	0.977950	0.970292	0.995726	0.981270	0.955958	0.983008	0.988734	0.986160	0.978622	0.998784	0.967794	0.935996	0.986272	0.960840	0.997824	0.994524	0.980534	0.928608	0.977444	0.994220	0.941802	0.975802	0.969026	0.945196	0.972034	0.987038	0.974966	0.967460	0.995442	0.973740	0.993352	0.987806	0.954602	0.984526	0.978060	0.939190	0.980952	0.985354	0.938948	0.904282
NorCap-T01-1738	0.915618	0.857326	0.936056	0.919688	0.919040	0.893434	0.871898	0.932206	0.872906	0.969036	0.944324	0.990700	0.948584	0.977180	0.904870	0.931312	0.931996	0.994038	0.964538	0.917826	0.898666	0.966496	0.923258	0.937638	0.941930	0.905042	0.979308	0.972238	0.919526	0.916112	0.958040	0.923746	0.961134	0.892712	0.849390	0.900476	0.779876	0.933624	0.909276	0.946964	0.912662	0.955212	0.953258	0.850016	0.956632	0.926038	0.879746	0.944486	0.902308
NorCap-T01-1740	0.856826	0.813776	0.891852	0.839582	0.887712	0.841526	0.901334	0.889922	0.887386	0.862818	0.912320	0.995908	0.875816	0.868668	0.881298	0.904286	0.851880	0.938818	0.940802	0.832086	0.881628	0.942300	0.879858	0.897596	0.897986	0.897362	0.957604	0.928920	0.919530	0.918960	0.860592	0.869360	0.897586	0.863684	0.821816	0.902732	0.813442	0.904306	0.897526	0.953392	0.915008	0.826192	0.899132	0.838980	0.900576	0.834400	0.857148	0.916832	0.865508
NorCap-TR99-196	0.930196	0.952230	0.958752	0.937298	0.972182	0.920284	0.931524	0.876862	0.941128	0.947086	0.940474	0.992454	0.935442	0.917468	0.942566	0.954990	0.959132	0.982938	0.986708	0.888006	0.921002	0.985876	0.919046	0.923022	0.935244	0.935484	0.943666	0.963408	0.963024	0.906946	0.962310	0.935322	0.931576	0.934716	0.907136	0.953110	0.928720	0.953770	0.933666	0.986002	0.941612	0.912840	0.995910	0.958688	0.903026	0.942772	0.948920	0.933176	0.942742
NorCap-TR99-204	0.897748	0.842090	0.938350	0.903396	0.919324	0.918012	0.946998	0.902258	0.901094	0.908898	0.912700	0.989888	0.862602	0.905550	0.927554	0.947054	0.838796	0.976810	0.940512	0.942026	0.944658	0.969290	0.929892	0.923636	0.920078	0.884790	0.919284	0.940284	0.911882	0.976894	0.938290	0.921748	0.911892	0.924156	0.905388	0.969070	0.876336	0.909304	0.881914	0.874318	0.946364	0.869486	0.962032	0.901888	0.935880	0.815506	0.879754	0.927666	0.924032
NorCap-TR99-210	0.952582	0.972928	0.947846	0.971512	0.964474	0.939972	0.964526	0.824192	0.942938	0.962658	0.972996	0.980282	0.963246	0.951506	0.967626	0.963956	0.976556	0.984764	0.974482	0.960524	0.937898	0.981430	0.969332	0.998500	0.977452	0.960806	0.950380	0.952814	0.978084	0.946498	0.947872	0.975200	0.926386	0.931108	0.964972	0.974442	0.950942	0.986652	0.979492	0.985774	0.959124	0.932704	0.991298	0.990066	0.919532	0.965708	0.964022	0.917380	0.950372
NorCap-TT00-419	0.931148	0.876860	0.889200	0.875808	0.918068	0.963832	0.890674	0.904428	0.892124	0.899842	0.931840	0.965878	0.913004	0.883554	0.896104	0.932016	0.903294	0.915460	0.966144	0.917816	0.906078	0.955870	0.940086	0.932544	0.919442	0.920706	0.949176	0.969190	0.929218	0.908042	0.913486	0.903876	0.828594	0.887438	0.895058	0.917646	0.898902	0.915704	0.926550	0.962758	0.895696	0.864754	0.960182	0.885308	0.900576	0.915286	0.851932	0.879808	0.984632
NorCap-U00-197	0.891842	0.815958	0.908506	0.888922	0.894592	0.919670	0.862220	0.904580	0.909012	0.936992	0.933900	0.984624	0.948312	0.907954	0.924714	0.945406	0.924146	0.924980	0.948266	0.955196	0.901612	0.973652	0.958780	0.940672	0.936732	0.879240	0.984626	0.948128	0.893932	0.918690	0.960008	0.929744	0.934196	0.856838	0.943392	0.969998	0.836646	0.954522	0.956308	0.881480	0.897164	0.929978	0.958512	0.906510	0.940168	0.812724	0.926982	0.930092	0.876922
NorCap-U00-199	0.868106	0.832458	0.925256	0.892418	0.941788	0.836482	0.907742	0.817642	0.868176	0.908844	0.912726	0.988054	0.889612	0.866958	0.880324	0.901050	0.862120	0.960714	0.980854	0.860958	0.845762	0.955148	0.916208	0.894980	0.889480	0.883798	0.951504	0.937412	0.903124	0.871892	0.919046	0.875696	0.869080	0.865956	0.873578	0.880000	0.834282	0.941182	0.910120	0.890386	0.905424	0.829084	0.952750	0.896308	0.863544	0.872240	0.878472	0.889564	0.870918
NorCap-U00-200	0.903806	0.903554	0.866894	0.903814	0.928746	0.872426	0.871924	0.925316	0.845906	0.958912	0.904310	0.989436	0.927144	0.864442	0.878046	0.929638	0.931586	0.990566	0.986212	0.910182	0.875542	0.966272	0.876356	0.898376	0.931998	0.899258	0.976834	0.949656	0.886172	0.878942	0.961724	0.919558	0.855520	0.802512	0.885642	0.885188	0.809444	0.941880	0.873746	0.941010	0.887240	0.907038	0.927928	0.884876	0.900140	0.937744	0.920110	0.941008	0.896870
NorCap-U00-201	0.888512	0.863352	0.806392	0.870814	0.894266	0.905056	0.878074	0.833792	0.828758	0.910252	0.832440	0.985904	0.929816	0.843698	0.907634	0.898810	0.919038	0.951712	0.953774	0.909390	0.824020	0.979516	0.937102	0.931476	0.938110	0.869914	0.950696	0.885258	0.885930	0.895190	0.918798	0.905386	0.805498	0.825496	0.929890	0.972176	0.844708	0.947216	0.934314	0.963318	0.913060	0.926688	0.946714	0.914768	0.888386	0.833636	0.854274	0.814248	0.841194
NorCap-U00-202	0.951374	0.944392	0.969550	0.970240	0.951876	0.948116	0.976202	0.962712	0.977584	0.975430	0.991486	0.997020	0.982094	0.980992	0.975312	0.991740	0.949336	0.982348	0.997426	0.989456	0.970612	0.989276	0.989960	0.981194	0.967968	0.937284	0.992948	0.956722	0.953662	0.989006	0.972116	0.990884	0.982226	0.964872	0.988814	0.993290	0.949424	0.993122	0.996368	0.903996	0.980124	0.945026	0.966814	0.960420	0.978352	0.890636	0.974124	0.952616	0.952278
NorCap-U00-209	0.909478	0.881574	0.938714	0.942410	0.918198	0.921764	0.939746	0.908964	0.929822	0.919508	0.939020	0.989864	0.903686	0.887956	0.931566	0.976486	0.883272	0.992982	0.987678	0.937012	0.947840	0.993854	0.941926	0.896248	0.909846	0.872962	0.993984	0.954612	0.898046	0.980516	0.960290	0.954234	0.928424	0.911902	0.944174	0.971230	0.863706	0.959322	0.939798	0.899542	0.944984	0.895488	0.968710	0.917338	0.951314	0.838468	0.929986	0.936814	0.901966
NorCap-U00-212	0.909082	0.842754	0.802576	0.884678	0.923928	0.890080	0.848064	0.858518	0.810074	0.886260	0.832192	0.976996	0.844706	0.833646	0.833390	0.921532	0.848698	0.970786	0.923858	0.937454	0.819864	0.972708	0.934536	0.877610	0.876940	0.830976	0.994806	0.940812	0.862208	0.861722	0.942428	0.863470	0.828958	0.752250	0.840164	0.887460	0.719118	0.924876	0.853826	0.914916	0.856942	0.925150	0.934752	0.868018	0.864918	0.875572	0.853340	0.923484	0.898358
NorCap-U00-215	0.922428	0.911652	0.818910	0.902032	0.873926	0.932322	0.933004	0.940758	0.910628	0.962876	0.969916	0.988992	0.965092	0.907004	0.927224	0.906300	0.942174	0.964178	0.948876	0.951352	0.943030	0.979272	0.923848	0.968848	0.934914	0.910936	0.998040	0.937682	0.899846	0.976648	0.957326	0.945368	0.924040	0.896636	0.910238	0.970056	0.864888	0.964102	0.983136	0.895448	0.905458	0.858406	0.963472	0.930466	0.905246	0.829738	0.876496	0.798784	0.842168
NorCap-U01-1191	0.915092	0.931870	0.954636	0.942996	0.938444	0.953978	0.892612	0.947080	0.896486	0.969758	0.948634	0.992598	0.927936	0.924796	0.926708	0.926930	0.976908	0.983542	0.972458	0.930828	0.943896	0.967598	0.942234	0.976064	0.959836	0.923428	0.958178	0.976902	0.975426	0.929298	0.977188	0.929658	0.917984	0.930668	0.934508	0.962174	0.941854	0.974370	0.959640	0.977486	0.963596	0.968464	0.989368	0.949636	0.956352	0.929870	0.958738	0.961512	0.929538
NorCap-U01-1195	0.822384	0.824188	0.806286	0.844278	0.873570	0.862382	0.823026	0.799970	0.827124	0.883980	0.870360	0.979486	0.899096	0.844636	0.864578	0.898930	0.894776	0.947022	0.908844	0.912504	0.827910	0.964748	0.933712	0.920068	0.936580	0.835560	0.918802	0.895884	0.856482	0.866924	0.901168	0.888690	0.768630	0.807286	0.887874	0.945584	0.802616	0.931760	0.911292	0.933206	0.873068	0.870604	0.966270	0.852708	0.839972	0.873518	0.821900	0.803492	0.847742
NorCap-U01-1196	0.906746	0.896452	0.912072	0.931658	0.887322	0.907770	0.939090	0.949306	0.928896	0.936142	0.968762	0.982972	0.947064	0.945758	0.957190	0.914668	0.906644	0.983634	0.950262	0.953896	0.960522	0.969924	0.955118	0.961180	0.937892	0.872754	0.983220	0.906180	0.907590	0.985368	0.925682	0.924204	0.932886	0.940362	0.945672	0.972892	0.860186	0.978192	0.974790	0.897200	0.963888	0.907872	0.951570	0.939678	0.961616	0.854788	0.903374	0.846566	0.822256
NorCap-U01-1204	0.910864	0.921776	0.967362	0.918672	0.925456	0.917766	0.963560	0.950090	0.973274	0.948168	0.970154	0.994788	0.933706	0.923802	0.944720	0.963690	0.924036	0.950196	0.974878	0.949778	0.963042	0.971462	0.971880	0.962314	0.964134	0.883922	0.994436	0.947792	0.930954	0.994478	0.912498	0.927276	0.955884	0.934694	0.962076	0.959362	0.889266	0.972182	0.981074	0.886866	0.955544	0.912072	0.971566	0.924072	0.974126	0.859390	0.925322	0.948946	0.904988
NorCap-U01-1208	0.891614	0.848346	0.920866	0.914820	0.929106	0.855424	0.940112	0.868582	0.890042	0.931722	0.906236	0.976238	0.917596	0.925872	0.905214	0.949172	0.910780	0.975730	0.943868	0.957462	0.913232	0.973668	0.960902	0.938826	0.955870	0.861156	0.947398	0.931666	0.910732	0.909546	0.940674	0.947168	0.886490	0.863282	0.940420	0.982662	0.823270	0.939570	0.909320	0.958558	0.943620	0.921102	0.961140	0.909820	0.923314	0.926316	0.901936	0.893716	0.866592
NorCap-U01-1607	0.885884	0.837444	0.930344	0.889672	0.903908	0.833540	0.911106	0.960084	0.927290	0.916652	0.965094	0.995138	0.910998	0.948618	0.939102	0.910176	0.913078	0.930256	0.928454	0.839322	0.927182	0.955666	0.927000	0.935770	0.942836	0.896718	0.993290	0.949516	0.913000	0.958926	0.904156	0.870010	0.960032	0.926496	0.815222	0.890762	0.854022	0.930960	0.962486	0.902034	0.941900	0.833824	0.928364	0.836990	0.937446	0.864112	0.870400	0.934346	0.867280
NorCap-U01-1615	0.913042	0.875846	0.949070	0.906466	0.896184	0.895262	0.881208	0.898760	0.919382	0.923122	0.943370	0.986824	0.935376	0.929996	0.927832	0.938034	0.869526	0.964768	0.965118	0.948878	0.927290	0.960364	0.915370	0.941378	0.937482	0.867168	0.983794	0.936378	0.896490	0.941954	0.904058	0.923860	0.940478	0.914500	0.944700	0.962918	0.890790	0.973500	0.953046	0.891774	0.940458	0.919176	0.944110	0.906606	0.960180	0.767054	0.923252	0.909214	0.914138
NorCap-U01-1631	0.986406	0.982210	0.991632	0.975568	0.995742	0.974990	0.976954	0.972162	0.969940	0.961746	0.973902	0.990118	0.961836	0.969490	0.978644	0.986832	0.973202	0.983894	0.984592	0.979076	0.966404	0.988524	0.960608	0.963626	0.977838	0.973540	0.988302	0.977206	0.978708	0.979988	0.974410	0.987910	0.977692	0.964250	0.993716	0.996756	0.978944	0.984992	0.971978	0.978602	0.989146	0.986002	0.987328	0.988324	0.977222	0.978524	0.983806	0.955332	0.983554
NorCap-U99-351	0.962738	0.980516	0.916206	0.978264	0.944970	0.942486	0.940974	0.931694	0.909492	0.962988	0.948972	0.997014	0.986046	0.925974	0.989330	0.934568	0.985746	0.982828	0.969724	0.982224	0.931960	0.981824	0.965902	0.997804	0.984232	0.932082	0.952228	0.957456	0.939642	0.931026	0.979560	0.987198	0.929558	0.930048	0.992522	0.995188	0.902314	0.988688	0.971818	0.959472	0.971296	0.922598	0.979972	0.975946	0.926900	0.900462	0.940022	0.801306	0.900772
NorCap-U99-355	0.885116	0.841664	0.847730	0.874790	0.873168	0.856788	0.840118	0.825844	0.806424	0.935142	0.926606	0.993292	0.925472	0.887796	0.879124	0.859906	0.931318	0.964338	0.967842	0.902278	0.866006	0.979656	0.893982	0.928554	0.924182	0.851450	0.946746	0.909888	0.881344	0.847398	0.938874	0.911400	0.876396	0.845504	0.873362	0.880038	0.696110	0.937392	0.885012	0.919264	0.852032	0.909560	0.963794	0.882222	0.893874	0.880652	0.855154	0.782344	0.800174
NorCap-U99-370	0.904928	0.930178	0.928238	0.940974	0.953638	0.894760	0.936588	0.844216	0.942508	0.968716	0.949936	0.995232	0.960884	0.921788	0.958778	0.990550	0.938060	0.976042	0.971848	0.956732	0.916492	0.953110	0.935112	0.970772	0.934482	0.896328	0.944674	0.947118	0.914060	0.907104	0.964678	0.968334	0.925216	0.910744	0.965938	0.981430	0.903306	0.938760	0.957732	0.902874	0.954408	0.841602	0.965438	0.947512	0.881284	0.844630	0.920222	0.869414	0.910312
[truncated: 48 more columns]

## Sheet: Thetayc
	FIT_1	FIT_10	FIT_11	FIT_12	FIT_14	FIT_15	FIT_16	FIT_17	FIT_18	FIT_19	FIT_2	FIT_21	FIT_22	FIT_24	FIT_28	FIT_29	FIT_3	FIT_35	FIT_38	FIT_4	FIT_40	FIT_41	FIT_42	FIT_43	FIT_44	FIT_46	FIT_5	FIT_50	FIT_9	Fresh_0103	Fresh_0201	Fresh_0203	Fresh_0401	Fresh_0501	Fresh_0503	Fresh_0601	Fresh_0603	Fresh_0701	Fresh_0703	Fresh_0801	Fresh_0803	Fresh_1001	Fresh_1003	Fresh_1010	NorCap-T00-414	NorCap-T00-415	NorCap-T00-422	NorCap-T00-984	NorCap-T01-1738
FIT_1
FIT_10	0.827346
FIT_11	0.950530	0.912427
FIT_12	0.869288	0.815537	0.898830
FIT_14	0.894052	0.751124	0.839448	0.900358
FIT_15	0.847176	0.880369	0.955337	0.889769	0.949599
FIT_16	0.914020	0.885492	0.901170	0.545030	0.917848	0.904458
FIT_17	0.870897	0.900230	0.938898	0.947240	0.953305	0.860979	0.969477
FIT_18	0.897654	0.861014	0.826090	0.828168	0.916012	0.897266	0.796136	0.929762
FIT_19	0.959765	0.906381	0.956430	0.930714	0.911375	0.888138	0.981075	0.843727	0.971643
FIT_2	0.956029	0.938741	0.732837	0.905415	0.981923	0.961610	0.895054	0.882525	0.772886	0.948328
FIT_21	0.903142	0.820767	0.958333	0.804938	0.990530	0.922115	0.917347	0.917482	0.699106	0.935398	0.878644
FIT_22	0.953127	0.870248	0.809855	0.909600	0.858851	0.922495	0.924402	0.875790	0.821553	0.909184	0.804810	0.921811
FIT_24	0.781260	0.846967	0.902597	0.851722	0.936616	0.893397	0.880603	0.829057	0.843432	0.738126	0.945958	0.872127	0.851942
FIT_28	0.944637	0.888353	0.937743	0.926943	0.864753	0.968720	0.971983	0.981799	0.925276	0.886876	0.958399	0.882567	0.941251	0.939448
FIT_29	0.894133	0.824557	0.960415	0.834885	0.901047	0.862184	0.892284	0.953886	0.913822	0.818337	0.970948	0.888860	0.951270	0.921741	0.833173
FIT_3	0.924909	0.861521	0.737229	0.866340	0.939408	0.891322	0.833278	0.886855	0.798846	0.972131	0.645336	0.945143	0.811030	0.930230	0.965365	0.857649
FIT_35	0.772762	0.800577	0.820954	0.921534	0.736380	0.867289	0.930346	0.877477	0.903192	0.960277	0.871550	0.969820	0.912984	0.936403	0.942915	0.936245	0.863870
FIT_38	0.978436	0.939353	0.948949	0.985204	0.958510	0.973704	0.974895	0.985780	0.963501	0.996199	0.966795	0.985183	0.966794	0.980129	0.993376	0.995518	0.967631	0.954225
FIT_4	0.952185	0.835202	0.937307	0.928478	0.901805	0.902915	0.876473	0.863635	0.669314	0.962832	0.910145	0.927798	0.814950	0.887780	0.986758	0.923463	0.876122	0.930255	0.968103
FIT_40	0.884034	0.890000	0.971896	0.877031	0.859049	0.929848	0.982188	0.821747	0.982940	0.689895	0.936255	0.918213	0.966197	0.845174	0.860429	0.769704	0.929489	0.864397	0.995446	0.964631
FIT_41	0.897691	0.902507	0.942530	0.750888	0.935129	0.879059	0.837743	0.938162	0.776441	0.923368	0.872044	0.767171	0.911366	0.856067	0.833664	0.769198	0.892302	0.951079	0.990142	0.887043	0.847729
FIT_42	0.907229	0.884415	0.708671	0.902807	0.880757	0.940689	0.889068	0.833862	0.577960	0.936530	0.613656	0.887494	0.635770	0.891853	0.951830	0.939494	0.634482	0.813666	0.957717	0.762516	0.934026	0.887295
FIT_43	0.941721	0.823824	0.810277	0.522702	0.867252	0.881304	0.449930	0.873636	0.849885	0.950314	0.822497	0.924735	0.824742	0.858467	0.967188	0.926473	0.801876	0.901765	0.963802	0.854199	0.956907	0.817318	0.834193
FIT_44	0.870978	0.915743	0.913855	0.805371	0.940946	0.856647	0.841881	0.910261	0.821851	0.692270	0.950790	0.859152	0.924423	0.644739	0.935677	0.675813	0.903975	0.973313	0.989378	0.888790	0.798105	0.763108	0.929851	0.883590
FIT_46	0.836237	0.770249	0.816244	0.793464	0.857285	0.764302	0.722828	0.903945	0.685736	0.984532	0.893239	0.881049	0.862158	0.769452	0.940800	0.857084	0.794216	0.777899	0.943351	0.810308	0.952815	0.819873	0.869086	0.733216	0.766156
FIT_5	0.952387	0.897474	0.928926	0.637673	0.930977	0.918253	0.564226	0.976804	0.824698	0.963033	0.961651	0.894647	0.930134	0.882054	0.966035	0.895994	0.930200	0.945139	0.985326	0.888722	0.939139	0.871076	0.934495	0.592306	0.850648	0.725037
FIT_50	0.894070	0.915845	0.965670	0.798917	0.951299	0.890269	0.961268	0.868071	0.958201	0.858028	0.918539	0.867252	0.922849	0.945653	0.896417	0.688372	0.866534	0.959699	0.991591	0.954035	0.832820	0.741230	0.894686	0.898541	0.791358	0.946707	0.961831
FIT_9	0.939506	0.965651	0.869654	0.977190	0.901046	0.943589	0.941818	0.822443	0.718595	0.965013	0.871922	0.965240	0.794256	0.911996	0.927458	0.961966	0.806714	0.945444	0.983265	0.804492	0.966201	0.892343	0.621538	0.877206	0.920246	0.921403	0.987759	0.911187
Fresh_0103	0.985562	0.982704	0.885831	0.946211	0.935214	0.965636	0.899160	0.973660	0.937769	0.952098	0.934421	0.973909	0.896002	0.943859	0.940049	0.974100	0.859286	0.957541	0.974760	0.976614	0.974438	0.895238	0.920483	0.917317	0.945643	0.923056	0.953546	0.874028	0.902912
Fresh_0201	0.883456	0.846261	0.892423	0.716582	0.903478	0.910286	0.861541	0.958065	0.701463	0.936983	0.889534	0.698834	0.917695	0.852444	0.855004	0.812163	0.769414	0.931152	0.977217	0.866923	0.852572	0.745082	0.812076	0.908192	0.789960	0.768517	0.876730	0.761302	0.897943	0.898017
Fresh_0203	0.941289	0.970867	0.808292	0.903143	0.815520	0.951226	0.941571	0.873676	0.906321	0.962126	0.938991	0.978643	0.942041	0.972611	0.928534	0.949627	0.866663	0.889458	0.977340	0.947482	0.930916	0.971427	0.870915	0.921319	0.971467	0.872801	0.932336	0.846438	0.925567	0.889916	0.718109
Fresh_0401	0.861462	0.861463	0.887836	0.923777	0.843130	0.879397	0.933375	0.900457	0.897448	0.975525	0.977601	0.968385	0.971865	0.918478	0.962788	0.950320	0.937732	0.804598	0.971585	0.949380	0.945399	0.946955	0.934139	0.918815	0.946189	0.766221	0.931449	0.973788	0.969855	0.973094	0.924252	0.818290
Fresh_0501	0.921451	0.830266	0.727220	0.863274	0.751762	0.953921	0.905009	0.912416	0.882870	0.908180	0.818364	0.938921	0.781585	0.920448	0.929860	0.904743	0.790171	0.796120	0.951047	0.876765	0.848142	0.906449	0.802371	0.819630	0.935352	0.858048	0.895243	0.928450	0.945817	0.867087	0.855063	0.873267	0.916522
Fresh_0503	0.926508	0.859163	0.724978	0.888293	0.804694	0.941775	0.897387	0.925584	0.892201	0.916599	0.813414	0.955309	0.793269	0.909473	0.954046	0.879913	0.759630	0.806682	0.955356	0.893408	0.881826	0.909301	0.797257	0.820151	0.915167	0.844448	0.892850	0.917169	0.933311	0.879211	0.869824	0.886284	0.921784	0.235532
Fresh_0601	0.866591	0.731929	0.771202	0.783236	0.854853	0.797079	0.729476	0.900298	0.711810	0.948452	0.772223	0.866421	0.836052	0.759677	0.980206	0.816982	0.727990	0.818107	0.939131	0.770446	0.931033	0.800950	0.819184	0.692622	0.741346	0.376419	0.758456	0.917872	0.936003	0.898490	0.763422	0.897878	0.823332	0.720303	0.671111
Fresh_0603	0.875155	0.807429	0.830030	0.796691	0.885697	0.787832	0.717458	0.861412	0.731239	0.945452	0.824934	0.868438	0.847546	0.776418	0.977313	0.771816	0.735993	0.847231	0.956298	0.778792	0.930821	0.797847	0.843817	0.718153	0.723316	0.439914	0.757861	0.886361	0.923030	0.872021	0.751399	0.874922	0.842404	0.745541	0.671805	0.178617
Fresh_0701	0.850288	0.695270	0.626637	0.819359	0.760051	0.827019	0.764000	0.903613	0.715549	0.951935	0.758278	0.871674	0.841314	0.802898	0.955567	0.869694	0.675419	0.688067	0.927212	0.820744	0.920091	0.854261	0.727012	0.714548	0.841288	0.513059	0.833388	0.931044	0.863266	0.880553	0.755100	0.862430	0.818787	0.629666	0.583766	0.382332	0.473306
Fresh_0703	0.859498	0.733358	0.675760	0.827878	0.789059	0.829149	0.759924	0.898908	0.731666	0.951280	0.768468	0.878712	0.860177	0.801686	0.961456	0.836296	0.672491	0.727881	0.936356	0.817656	0.915329	0.846422	0.750989	0.715224	0.826169	0.523979	0.814596	0.940853	0.859756	0.896725	0.754240	0.891365	0.846270	0.624758	0.550497	0.376067	0.430612	0.224330
Fresh_0801	0.857232	0.782403	0.824416	0.896964	0.826343	0.860165	0.926320	0.950279	0.897605	0.984399	0.975600	0.965441	0.924298	0.883780	0.881705	0.965279	0.909348	0.754041	0.947638	0.968810	0.964248	0.913720	0.934269	0.912454	0.924685	0.600333	0.935062	0.918117	0.889085	0.774605	0.859234	0.811567	0.777111	0.873095	0.871236	0.754911	0.790399	0.715407	0.774992
Fresh_0803	0.906750	0.865488	0.809396	0.912918	0.831339	0.921681	0.946899	0.947184	0.929421	0.928473	0.983031	0.960438	0.900085	0.880612	0.857956	0.975736	0.924250	0.835945	0.962861	0.991184	0.944888	0.921833	0.929763	0.942985	0.922650	0.774222	0.960020	0.872582	0.896455	0.648672	0.829138	0.788216	0.838360	0.841763	0.856017	0.852244	0.849157	0.808962	0.865100	0.320712
Fresh_1001	0.927095	0.863608	0.926343	0.886738	0.909651	0.920680	0.898197	0.973256	0.879005	0.952914	0.972491	0.935697	0.917068	0.918993	0.962974	0.873299	0.882356	0.897997	0.974156	0.948304	0.951443	0.878146	0.900202	0.944736	0.882871	0.860125	0.934201	0.850322	0.955032	0.613869	0.859045	0.915190	0.930550	0.939951	0.939801	0.858581	0.870129	0.867033	0.879800	0.774802	0.739423
Fresh_1003	0.977795	0.931149	0.947397	0.920762	0.959525	0.962219	0.954927	0.984713	0.932002	0.965583	0.987747	0.943260	0.931808	0.966097	0.984491	0.894610	0.892260	0.966984	0.987729	0.979903	0.951799	0.914564	0.924545	0.978448	0.940211	0.983023	0.971297	0.865526	0.962128	0.596326	0.885645	0.930895	0.989918	0.952721	0.959472	0.960124	0.956728	0.936707	0.953395	0.900373	0.825084	0.271930
Fresh_1010	0.953769	0.951384	0.923344	0.939717	0.912813	0.964788	0.907843	0.963825	0.954609	0.894882	0.978324	0.958882	0.901171	0.916990	0.873036	0.919412	0.915987	0.949547	0.978836	0.983375	0.923656	0.851011	0.938271	0.947746	0.914628	0.939615	0.963415	0.817860	0.909527	0.220508	0.865401	0.867133	0.966045	0.893426	0.912514	0.938988	0.909244	0.913395	0.933669	0.779623	0.647327	0.665658	0.678433
NorCap-T00-414	0.891487	0.826918	0.937794	0.876078	0.958939	0.851538	0.891417	0.905343	0.823205	0.955297	0.930786	0.782190	0.952905	0.855729	0.925180	0.938548	0.907507	0.890217	0.963533	0.932155	0.939179	0.882877	0.886108	0.885296	0.903896	0.770446	0.900767	0.924760	0.948458	0.935829	0.731025	0.941413	0.914388	0.935142	0.926101	0.791446	0.787555	0.780984	0.798818	0.837495	0.874000	0.880141	0.929203	0.934665
NorCap-T00-415	0.855452	0.709940	0.945193	0.768224	0.949045	0.808322	0.707397	0.731678	0.677225	0.938884	0.885106	0.709377	0.922306	0.820341	0.908926	0.767986	0.753778	0.909616	0.981868	0.774045	0.911960	0.776803	0.857704	0.753088	0.799212	0.642387	0.742925	0.896670	0.886571	0.956151	0.786893	0.894008	0.868821	0.903877	0.925784	0.706173	0.654804	0.771222	0.747210	0.924588	0.963374	0.892212	0.929222	0.959281	0.826417
NorCap-T00-422	0.946375	0.941628	0.960283	0.926096	0.974864	0.910980	0.855860	0.979518	0.891702	0.980131	0.974411	0.949995	0.964108	0.908469	0.996332	0.906276	0.925225	0.973570	0.975758	0.916788	0.989006	0.924736	0.983100	0.902710	0.800827	0.770739	0.875586	0.867681	0.962616	0.728132	0.911693	0.936563	0.948461	0.954324	0.937632	0.750706	0.730991	0.859277	0.861751	0.780855	0.777971	0.718342	0.800661	0.777608	0.874182	0.866647
NorCap-T00-984	0.872290	0.758101	0.926116	0.869335	0.885236	0.887358	0.907453	0.944473	0.951622	0.992617	0.990482	0.981758	0.991643	0.956793	0.989966	0.996300	0.969665	0.797792	0.933158	0.997366	0.967428	0.995974	0.973354	0.871361	0.986560	0.763262	0.927201	0.947054	0.975958	0.903474	0.943846	0.913718	0.806241	0.941074	0.938208	0.835453	0.882556	0.805130	0.849494	0.589351	0.722761	0.835940	0.926296	0.912960	0.848751	0.959253	0.818093
NorCap-T01-1738	0.895446	0.810797	0.958415	0.954366	0.928597	0.898051	0.974249	0.953363	0.947831	0.999013	0.989983	0.978206	0.998730	0.950648	0.997724	0.984736	0.970045	0.850273	0.941852	0.981703	0.975789	0.984574	0.983961	0.952996	0.961700	0.767172	0.975956	0.995447	0.986194	0.988711	0.962447	0.995809	0.875574	0.965492	0.956406	0.842549	0.886295	0.835939	0.858751	0.747096	0.870906	0.922458	0.994812	0.992237	0.860801	0.954871	0.908210	0.350384
NorCap-T01-1740	0.788305	0.733560	0.894096	0.856503	0.861455	0.788061	0.913291	0.849184	0.898321	0.918717	0.943966	0.918528	0.913329	0.882442	0.959023	0.841759	0.893886	0.769444	0.958897	0.935440	0.894432	0.897922	0.930654	0.884604	0.831797	0.672847	0.925486	0.865124	0.938768	0.847052	0.888677	0.958173	0.809938	0.852118	0.836546	0.686821	0.707478	0.727566	0.751889	0.705714	0.805355	0.843544	0.928053	0.846449	0.829929	0.855263	0.855071	0.701680	0.738284
NorCap-U00-199	0.866335	0.875236	0.972859	0.949446	0.965674	0.823261	0.929424	0.591875	0.884861	0.957589	0.927517	0.942172	0.895729	0.933329	0.996113	0.911754	0.843427	0.880953	0.975380	0.824112	0.935364	0.939578	0.858293	0.901630	0.929985	0.812056	0.959270	0.827245	0.817162	0.903183	0.948457	0.842191	0.869216	0.971996	0.965989	0.866049	0.805907	0.900442	0.906012	0.848670	0.876567	0.854787	0.897725	0.917580	0.888540	0.694778	0.812536	0.815467	0.861868
NorCap-U00-201	0.868824	0.865368	0.737143	0.889437	0.887788	0.898033	0.902191	0.762296	0.852834	0.942187	0.746573	0.952007	0.824516	0.933901	0.973660	0.934581	0.730146	0.830375	0.965042	0.905628	0.937024	0.897323	0.752554	0.844051	0.956383	0.834706	0.939759	0.921107	0.903104	0.797259	0.895392	0.779671	0.844366	0.799873	0.824965	0.802062	0.813439	0.755612	0.790050	0.883752	0.895198	0.756462	0.738016	0.860201	0.939984	0.791550	0.966769	0.918538	0.949261
NorCap-U00-209	0.856194	0.757395	0.946079	0.946975	0.901357	0.873267	0.983554	0.922512	0.955231	0.978089	0.978547	0.963945	0.975094	0.942379	0.998830	0.984033	0.969353	0.766465	0.933213	0.994702	0.963173	0.987549	0.967623	0.945355	0.974222	0.750917	0.987087	0.963796	0.977880	0.926399	0.963944	0.980444	0.840861	0.918169	0.899357	0.801448	0.849663	0.786282	0.816076	0.619368	0.765122	0.850229	0.944350	0.932813	0.824174	0.972333	0.843162	0.263655	0.323961
NorCap-U00-212	0.852919	0.777253	0.740601	0.854353	0.893589	0.812865	0.810030	0.886292	0.735227	0.944856	0.738640	0.852786	0.855982	0.804772	0.952733	0.921079	0.749894	0.719061	0.937378	0.862093	0.942479	0.856179	0.790368	0.732980	0.838605	0.453682	0.844956	0.956255	0.887667	0.897383	0.874038	0.955771	0.831117	0.813377	0.785708	0.454490	0.578805	0.497204	0.515166	0.641109	0.795718	0.854231	0.965948	0.934768	0.771567	0.790879	0.812128	0.731102	0.757588
NorCap-U00-215	0.956598	0.940810	0.805738	0.915274	0.833898	0.958883	0.949851	0.978341	0.918142	0.986120	0.987179	0.987787	0.958104	0.972956	0.948924	0.976555	0.968702	0.905130	0.966200	0.991625	0.985552	0.981883	0.954126	0.929807	0.949490	0.846292	0.935586	0.843211	0.943041	0.821014	0.866231	0.633666	0.796501	0.873191	0.893917	0.893069	0.891873	0.854390	0.896193	0.679102	0.658474	0.846263	0.886048	0.841694	0.941983	0.962573	0.806926	0.740782	0.920423
NorCap-U01-1195	0.721480	0.809659	0.768813	0.862772	0.847438	0.797336	0.844360	0.608460	0.823106	0.942962	0.765984	0.893213	0.822224	0.893569	0.944832	0.926989	0.698346	0.718664	0.959654	0.849421	0.902088	0.924655	0.683697	0.802701	0.945792	0.746102	0.928226	0.847090	0.829580	0.908659	0.839659	0.744800	0.796718	0.825984	0.829917	0.759508	0.734078	0.686373	0.724987	0.787507	0.811669	0.896708	0.944566	0.925150	0.835470	0.716588	0.935824	0.841044	0.896402
NorCap-U01-1196	0.918130	0.889942	0.899403	0.943580	0.872739	0.920662	0.972256	0.950416	0.939940	0.970100	0.986161	0.975546	0.977298	0.972415	0.963276	0.967370	0.973736	0.832776	0.962752	0.989781	0.951814	0.964130	0.957530	0.955524	0.972293	0.849201	0.976071	0.918463	0.975222	0.845689	0.928968	0.814351	0.828684	0.935847	0.945723	0.889331	0.901221	0.862825	0.902310	0.700470	0.728135	0.856673	0.909671	0.834441	0.921951	0.963908	0.865837	0.724585	0.857445
NorCap-U01-1204	0.933707	0.919680	0.980049	0.954583	0.949751	0.930262	0.963515	0.966768	0.986643	0.981509	0.986774	0.971332	0.927068	0.968777	0.989284	0.960626	0.961101	0.869873	0.973434	0.997194	0.950499	0.959772	0.977582	0.968072	0.969181	0.896903	0.986033	0.830362	0.981315	0.657372	0.946503	0.923647	0.925543	0.960549	0.967927	0.908105	0.907407	0.921171	0.943481	0.706292	0.660614	0.677520	0.745408	0.688263	0.897410	0.983709	0.624611	0.729925	0.893110
NorCap-U01-1208	0.829588	0.744800	0.919840	0.933156	0.884583	0.805047	0.981018	0.854494	0.927237	0.980251	0.953090	0.950519	0.970962	0.929852	0.981714	0.984771	0.934668	0.744581	0.948430	0.966037	0.953811	0.982590	0.932874	0.915388	0.978050	0.731813	0.984217	0.971342	0.956331	0.980545	0.945774	0.937965	0.806546	0.936692	0.933406	0.816076	0.858470	0.780347	0.818669	0.676549	0.820221	0.903204	0.981155	0.979845	0.797060	0.907739	0.947200	0.531338	0.587225
NorCap-U01-1607	0.834675	0.801126	0.906771	0.912709	0.883412	0.796400	0.924126	0.947423	0.933448	0.945283	0.982268	0.945260	0.951208	0.939430	0.952197	0.809347	0.942565	0.833904	0.960451	0.969232	0.920638	0.902472	0.970648	0.935385	0.777670	0.770820	0.948563	0.802955	0.932542	0.834209	0.916167	0.940076	0.856999	0.940101	0.919925	0.781732	0.785203	0.801144	0.826378	0.663358	0.744780	0.790235	0.882461	0.829097	0.866725	0.918078	0.664637	0.666899	0.769352
NorCap-U01-1615	0.945965	0.908147	0.980788	0.955269	0.927140	0.934920	0.920169	0.947560	0.966740	0.965111	0.986320	0.980466	0.969729	0.970243	0.993143	0.981835	0.947266	0.905648	0.968756	0.961765	0.941228	0.970727	0.982856	0.956321	0.976794	0.899702	0.962026	0.854163	0.975335	0.584033	0.948121	0.907439	0.948252	0.914928	0.920501	0.883211	0.871620	0.877060	0.897662	0.705310	0.644806	0.655447	0.724411	0.630053	0.892569	0.952327	0.506103	0.704956	0.885616
NorCap-U99-355	0.871740	0.849617	0.846905	0.897272	0.848319	0.827948	0.885368	0.747726	0.814720	0.969019	0.939453	0.940953	0.939368	0.908117	0.968667	0.926695	0.871755	0.828277	0.949207	0.854655	0.952769	0.939625	0.889824	0.854861	0.907314	0.602870	0.885870	0.920295	0.901508	0.938231	0.878288	0.677200	0.736083	0.916821	0.922525	0.749223	0.722858	0.750436	0.783193	0.708111	0.801877	0.900381	0.965210	0.948405	0.864004	0.711525	0.868922	0.689452	0.751247
NorCap-U99-370	0.965754	0.971015	0.988619	0.983990	0.990057	0.952772	0.957140	0.911622	0.982819	0.990978	0.983469	0.989640	0.967573	0.988638	0.996901	0.986146	0.948224	0.964156	0.980124	0.951209	0.986564	0.993215	0.971313	0.972005	0.989236	0.953378	0.990450	0.844640	0.945237	0.725368	0.964036	0.888757	0.961922	0.987199	0.987953	0.954056	0.927706	0.967361	0.979006	0.821024	0.767312	0.729476	0.760041	0.769766	0.924920	0.939480	0.509867	0.758372	0.937045
[truncated: 14 more columns]

## Sheet: Jclass
	FIT_1	FIT_10	FIT_11	FIT_12	FIT_14	FIT_15	FIT_16	FIT_17	FIT_18	FIT_19	FIT_2	FIT_21	FIT_22	FIT_24	FIT_28	FIT_29	FIT_3	FIT_35	FIT_38	FIT_4	FIT_40	FIT_41	FIT_42	FIT_43	FIT_44	FIT_46	FIT_5	FIT_50	FIT_9	Fresh_0103	Fresh_0201	Fresh_0203	Fresh_0401	Fresh_0501	Fresh_0503	Fresh_0601	Fresh_0603	Fresh_0701	Fresh_0703	Fresh_0801	Fresh_0803	Fresh_1001	Fresh_1003	Fresh_1010	NorCap-T00-414	NorCap-T00-415	NorCap-T00-422	NorCap-T00-984	NorCap-T01-1738
FIT_1
FIT_10	0.975540
FIT_11	0.983774	0.976554
FIT_12	0.971935	0.964758	0.976039
FIT_14	0.976867	0.974543	0.977217	0.978848
FIT_15	0.987154	0.977536	0.984005	0.981091	0.990449
FIT_16	0.978167	0.964876	0.977313	0.971793	0.974847	0.981570
FIT_17	0.983325	0.970766	0.980411	0.983026	0.985117	0.985039	0.979783
FIT_18	0.977495	0.973434	0.974125	0.967720	0.983175	0.984332	0.969837	0.973503
FIT_19	0.980064	0.963124	0.967490	0.967182	0.970746	0.976035	0.967699	0.967961	0.962349
FIT_2	0.983175	0.973771	0.981977	0.972261	0.985343	0.985739	0.980243	0.982753	0.973996	0.968775
FIT_21	0.986140	0.976760	0.977193	0.976183	0.988301	0.985476	0.987256	0.980545	0.976937	0.976824	0.980140
FIT_22	0.980543	0.961023	0.964648	0.974294	0.970739	0.973508	0.957261	0.979396	0.971369	0.956873	0.977342	0.973136
FIT_24	0.974054	0.958704	0.970400	0.968989	0.982321	0.975722	0.977486	0.970794	0.969863	0.966871	0.978783	0.974222	0.961899
FIT_28	0.983310	0.979139	0.977252	0.972922	0.982894	0.988929	0.977710	0.980682	0.984373	0.974423	0.981115	0.984845	0.979967	0.978863
FIT_29	0.980791	0.974852	0.984019	0.976315	0.981469	0.986989	0.980694	0.984269	0.987129	0.968492	0.981601	0.983823	0.977189	0.981597	0.981677
FIT_3	0.981791	0.972362	0.972200	0.977117	0.981992	0.981251	0.973221	0.983909	0.977461	0.973692	0.971359	0.979978	0.970849	0.980565	0.979935	0.981708
FIT_35	0.975806	0.974360	0.976504	0.978128	0.977215	0.988246	0.972944	0.976448	0.979102	0.973595	0.983086	0.980847	0.980719	0.981790	0.979496	0.981746	0.973668
FIT_38	0.976490	0.972689	0.969252	0.976183	0.975072	0.980331	0.968757	0.975867	0.971455	0.964561	0.976797	0.980153	0.962135	0.973146	0.980234	0.983417	0.973313	0.962063
FIT_4	0.989434	0.972991	0.986420	0.985106	0.989559	0.988796	0.981487	0.981969	0.977936	0.977795	0.985841	0.984842	0.979100	0.979687	0.991241	0.988120	0.988461	0.988518	0.984305
FIT_40	0.988636	0.981710	0.988857	0.978917	0.984048	0.986818	0.986266	0.978805	0.989217	0.975645	0.983031	0.982360	0.984856	0.982310	0.985782	0.982839	0.983983	0.984491	0.988070	0.992565
FIT_41	0.979681	0.969505	0.971399	0.973169	0.982153	0.981375	0.971943	0.977662	0.970111	0.971290	0.973754	0.975981	0.968352	0.970823	0.975042	0.979357	0.973755	0.978145	0.976268	0.983184	0.981106
FIT_42	0.978598	0.967964	0.964524	0.968326	0.970880	0.977437	0.970757	0.974846	0.963316	0.955392	0.962650	0.976883	0.950575	0.964197	0.976001	0.980387	0.960637	0.975263	0.957734	0.977606	0.981829	0.967919
FIT_43	0.979217	0.957041	0.962387	0.968649	0.971313	0.975502	0.964199	0.967948	0.963313	0.961457	0.972332	0.974839	0.956567	0.954952	0.972192	0.978254	0.965088	0.970202	0.966109	0.976780	0.981820	0.964481	0.947432
FIT_44	0.979627	0.956152	0.974357	0.970765	0.979635	0.983006	0.978478	0.972529	0.967812	0.958158	0.971834	0.976317	0.967567	0.960979	0.972555	0.977391	0.973163	0.983378	0.973531	0.980055	0.980888	0.970375	0.959364	0.962610
FIT_46	0.981723	0.978546	0.972701	0.977426	0.981981	0.985345	0.974735	0.981074	0.977591	0.977048	0.981700	0.979420	0.966921	0.977497	0.982829	0.987846	0.982273	0.982040	0.970623	0.988114	0.983761	0.984840	0.971144	0.971895	0.979570
FIT_5	0.979031	0.975649	0.974891	0.971150	0.984916	0.983108	0.980531	0.980216	0.976420	0.971504	0.982366	0.979470	0.969261	0.977687	0.983310	0.980949	0.978467	0.976160	0.974348	0.990613	0.983540	0.974128	0.951777	0.964557	0.972479	0.979068
FIT_50	0.985944	0.975641	0.982502	0.979918	0.988772	0.985626	0.985240	0.981702	0.980114	0.974147	0.980123	0.981546	0.976736	0.973275	0.982023	0.983848	0.987398	0.988680	0.983036	0.986757	0.986181	0.983078	0.974009	0.972152	0.975220	0.981068	0.980907
FIT_9	0.986112	0.971569	0.974537	0.975019	0.983309	0.983507	0.976659	0.984933	0.969960	0.973593	0.977939	0.974023	0.957255	0.977076	0.987457	0.982398	0.973229	0.978757	0.984443	0.981728	0.989517	0.975286	0.961545	0.962672	0.977319	0.979178	0.981991	0.977381
Fresh_0103	0.981677	0.961799	0.965907	0.970150	0.979396	0.971104	0.967309	0.972365	0.968532	0.965201	0.976095	0.969687	0.941872	0.970075	0.976782	0.974131	0.962689	0.976043	0.967876	0.983137	0.980607	0.966264	0.951629	0.951863	0.973696	0.966024	0.969932	0.981386	0.962849
Fresh_0201	0.974704	0.948309	0.958096	0.958224	0.974012	0.974028	0.966371	0.972517	0.961429	0.949880	0.965482	0.971332	0.954753	0.958839	0.968115	0.971629	0.968583	0.973915	0.962028	0.973817	0.980836	0.956854	0.952577	0.960881	0.942322	0.970310	0.968026	0.963829	0.944890	0.945386
Fresh_0203	0.979203	0.963416	0.971698	0.965689	0.980897	0.978430	0.967244	0.971849	0.969030	0.959716	0.975574	0.973782	0.964761	0.971893	0.972293	0.978210	0.965442	0.971890	0.967740	0.978846	0.987897	0.971855	0.955823	0.961824	0.958458	0.979408	0.964316	0.975637	0.967413	0.954057	0.908430
Fresh_0401	0.975015	0.980097	0.979001	0.974395	0.978472	0.985866	0.976486	0.980676	0.972764	0.976780	0.987841	0.980086	0.976584	0.969760	0.983948	0.985666	0.979960	0.966648	0.970763	0.988953	0.981912	0.982598	0.967203	0.975231	0.975556	0.979286	0.973993	0.988556	0.983675	0.973417	0.964382	0.973889
Fresh_0501	0.975672	0.957787	0.958525	0.956140	0.973148	0.977226	0.959398	0.968865	0.962140	0.955068	0.978197	0.971497	0.946321	0.964944	0.980674	0.975420	0.965396	0.968840	0.955560	0.982018	0.982109	0.963376	0.948579	0.951438	0.955224	0.968765	0.961654	0.974984	0.970483	0.950563	0.938860	0.947816	0.974233
Fresh_0503	0.970912	0.961235	0.958724	0.967645	0.964621	0.980568	0.971117	0.966288	0.967442	0.965539	0.981562	0.973355	0.949738	0.963975	0.977967	0.979278	0.963643	0.966204	0.963568	0.980427	0.981280	0.966465	0.948884	0.952293	0.963754	0.970355	0.952302	0.973564	0.967656	0.949766	0.938824	0.940505	0.964047	0.883349
Fresh_0601	0.977410	0.962598	0.968519	0.964763	0.978178	0.974776	0.964673	0.965329	0.966092	0.960260	0.973851	0.972750	0.959733	0.959690	0.978821	0.976261	0.969730	0.975025	0.956314	0.977744	0.978464	0.968144	0.944327	0.957595	0.959128	0.966106	0.965973	0.969525	0.965388	0.956983	0.933299	0.948711	0.961919	0.933491	0.943354
Fresh_0603	0.980937	0.963428	0.967403	0.970350	0.979653	0.978206	0.968487	0.967746	0.964160	0.958821	0.967860	0.969782	0.952342	0.959966	0.979768	0.973979	0.964346	0.978155	0.962541	0.983580	0.976797	0.968243	0.944775	0.951206	0.962514	0.969849	0.962263	0.964345	0.964428	0.948782	0.938737	0.945593	0.963558	0.934136	0.940285	0.887040
Fresh_0701	0.979283	0.964769	0.962047	0.968128	0.972265	0.968578	0.964831	0.969940	0.970293	0.962351	0.970386	0.969328	0.950638	0.962465	0.977190	0.978585	0.962258	0.966191	0.964919	0.978995	0.979242	0.969807	0.952387	0.949764	0.965890	0.967253	0.959909	0.976409	0.956176	0.941839	0.942932	0.953728	0.969232	0.941372	0.932699	0.950210	0.947631
Fresh_0703	0.973727	0.964184	0.962505	0.970714	0.973201	0.978842	0.971865	0.971823	0.970009	0.966157	0.968696	0.971393	0.951652	0.960438	0.983626	0.976892	0.966588	0.967495	0.960753	0.982635	0.977996	0.968583	0.956293	0.953210	0.967208	0.968930	0.962284	0.972109	0.962399	0.946801	0.950164	0.956278	0.964982	0.941406	0.943000	0.943420	0.955599	0.915441
Fresh_0801	0.983950	0.962094	0.970385	0.972657	0.978734	0.984801	0.974210	0.983447	0.970827	0.970846	0.979795	0.973807	0.959295	0.969721	0.976827	0.980630	0.968763	0.979774	0.967815	0.985444	0.988621	0.972656	0.966598	0.958642	0.969364	0.974999	0.976110	0.976779	0.964762	0.947843	0.950394	0.956021	0.974827	0.955805	0.944085	0.956944	0.951314	0.961236	0.963727
Fresh_0803	0.981467	0.968465	0.968460	0.973981	0.978628	0.985857	0.972775	0.981369	0.970816	0.967276	0.983942	0.981066	0.958254	0.966795	0.978532	0.976293	0.976342	0.974463	0.961209	0.989021	0.986310	0.969937	0.961881	0.968562	0.962455	0.982271	0.970716	0.980121	0.973334	0.953319	0.949026	0.963568	0.967953	0.940665	0.949825	0.957394	0.949504	0.964332	0.963500	0.923761
Fresh_1001	0.982790	0.967417	0.979739	0.971083	0.980657	0.981681	0.972043	0.982894	0.973110	0.964183	0.971251	0.972430	0.971216	0.960077	0.981727	0.973855	0.971597	0.980769	0.964545	0.984797	0.975952	0.961859	0.955055	0.964828	0.958192	0.978197	0.978992	0.975917	0.963272	0.956864	0.935672	0.960182	0.966897	0.954395	0.967634	0.945150	0.955624	0.961497	0.964350	0.961213	0.955909
Fresh_1003	0.985700	0.976271	0.980122	0.979517	0.986783	0.977788	0.978944	0.982996	0.975910	0.972084	0.982633	0.979622	0.966675	0.966330	0.980031	0.979495	0.980384	0.983442	0.973347	0.988482	0.986126	0.972989	0.960467	0.970376	0.973405	0.984415	0.973582	0.974911	0.971425	0.963890	0.957485	0.967637	0.979216	0.958679	0.970234	0.955458	0.969488	0.955649	0.971301	0.981512	0.958703	0.903447
Fresh_1010	0.975950	0.962133	0.965294	0.974414	0.977467	0.971410	0.962664	0.976898	0.970235	0.961411	0.981859	0.973968	0.943497	0.969877	0.973325	0.980512	0.967549	0.973377	0.970144	0.983823	0.979372	0.961811	0.958699	0.961430	0.966895	0.971307	0.963443	0.975508	0.968014	0.897969	0.938332	0.957404	0.976206	0.947827	0.945700	0.957252	0.961132	0.946865	0.950823	0.960365	0.958151	0.952802	0.959527
NorCap-T00-414	0.980590	0.973924	0.983002	0.979081	0.987758	0.975355	0.980607	0.975621	0.976821	0.970297	0.979144	0.976478	0.975060	0.966365	0.987430	0.984170	0.978687	0.985667	0.979135	0.986585	0.983232	0.977534	0.965934	0.968599	0.972634	0.981493	0.976576	0.982168	0.973289	0.970923	0.956504	0.964630	0.985081	0.971314	0.967539	0.961841	0.963121	0.962635	0.968974	0.973440	0.973762	0.966135	0.973629	0.970703
NorCap-T00-415	0.988559	0.981350	0.986406	0.984430	0.992854	0.991449	0.988592	0.985595	0.986314	0.983866	0.986512	0.986051	0.991208	0.987103	0.984442	0.988855	0.985436	0.987700	0.982450	0.993309	0.988319	0.984682	0.982201	0.982755	0.979316	0.989051	0.987579	0.989466	0.988614	0.983965	0.978943	0.986390	0.989020	0.981080	0.984147	0.983989	0.985534	0.983899	0.986234	0.989972	0.989968	0.979246	0.985053	0.983829	0.986606
NorCap-T00-422	0.982676	0.966972	0.980040	0.976690	0.979094	0.984255	0.981231	0.979437	0.982314	0.975155	0.983527	0.978114	0.968649	0.972980	0.988830	0.981824	0.983758	0.986067	0.970241	0.987425	0.987819	0.980718	0.970212	0.972327	0.970776	0.971441	0.973260	0.978616	0.970630	0.959095	0.947034	0.966235	0.976950	0.964153	0.958891	0.962581	0.956751	0.968536	0.963671	0.957670	0.968294	0.963784	0.979824	0.967132	0.967748	0.989912
NorCap-T00-984	0.985056	0.970110	0.986272	0.976150	0.981962	0.982734	0.974634	0.982009	0.983087	0.972263	0.984664	0.985272	0.970601	0.988353	0.981572	0.984923	0.980066	0.980771	0.969940	0.990772	0.983456	0.980911	0.973826	0.976509	0.971247	0.980651	0.971887	0.980374	0.970880	0.953382	0.953634	0.967193	0.970973	0.965364	0.963752	0.959701	0.963058	0.972254	0.974687	0.960368	0.963949	0.958167	0.973408	0.942956	0.981811	0.986515	0.963686
NorCap-T01-1738	0.985928	0.976088	0.983544	0.984954	0.986274	0.988581	0.984417	0.976922	0.980694	0.979433	0.980603	0.982090	0.985982	0.978303	0.987446	0.985255	0.978649	0.987785	0.979908	0.985134	0.988049	0.985497	0.981043	0.980070	0.969781	0.979602	0.988243	0.982624	0.975117	0.969000	0.959849	0.974467	0.978919	0.973999	0.969496	0.972017	0.975320	0.973887	0.975761	0.977660	0.982513	0.970124	0.983911	0.974849	0.969872	0.986567	0.972034	0.979785
NorCap-T01-1740	0.982671	0.972597	0.981408	0.976117	0.980777	0.980865	0.980135	0.981556	0.981474	0.970765	0.978376	0.977842	0.973477	0.974735	0.987724	0.975315	0.982485	0.988909	0.981319	0.991273	0.983581	0.978062	0.972303	0.973146	0.972258	0.981398	0.980073	0.978558	0.979351	0.964861	0.965202	0.971232	0.982823	0.967125	0.966056	0.970273	0.968538	0.972647	0.977498	0.972813	0.974472	0.967575	0.985182	0.961434	0.972024	0.988161	0.964855	0.969258	0.977613
NorCap-U00-199	0.983990	0.966915	0.984584	0.974317	0.987612	0.982724	0.983682	0.979276	0.969135	0.971775	0.976920	0.979653	0.970918	0.971321	0.990242	0.980776	0.980406	0.984865	0.977195	0.986745	0.987056	0.977665	0.972175	0.973084	0.965743	0.981206	0.979351	0.976841	0.972641	0.973952	0.967587	0.977365	0.978980	0.971391	0.972798	0.970507	0.972839	0.967552	0.972295	0.978880	0.978303	0.963027	0.962919	0.974065	0.973727	0.984999	0.978107	0.982636	0.986318
NorCap-U00-201	0.981839	0.969544	0.969269	0.968227	0.978556	0.981511	0.970564	0.980853	0.974679	0.974564	0.977673	0.980010	0.967341	0.977451	0.980664	0.980680	0.970692	0.977364	0.972930	0.986044	0.981680	0.975942	0.958331	0.970937	0.979828	0.977078	0.974699	0.987364	0.978515	0.958190	0.957998	0.953464	0.974544	0.956586	0.960875	0.959966	0.967800	0.965914	0.960464	0.975592	0.974485	0.961581	0.976199	0.964414	0.979922	0.986594	0.980522	0.976570	0.985952
NorCap-U00-209	0.977510	0.971993	0.973592	0.979483	0.975101	0.983181	0.978347	0.975590	0.975689	0.968773	0.981532	0.976360	0.959679	0.971331	0.991397	0.979722	0.978407	0.983242	0.974025	0.990149	0.986809	0.982380	0.966386	0.970191	0.971732	0.977913	0.972489	0.980304	0.973782	0.960337	0.953133	0.972860	0.970892	0.955123	0.952779	0.962609	0.957890	0.969346	0.963030	0.955744	0.965508	0.964270	0.976992	0.964687	0.962979	0.990009	0.939915	0.955925	0.972088
NorCap-U00-212	0.989940	0.978328	0.976122	0.986940	0.991292	0.987174	0.984318	0.979027	0.978820	0.971553	0.984232	0.978846	0.970706	0.974755	0.985485	0.989252	0.982619	0.981634	0.975864	0.977905	0.991850	0.979836	0.975702	0.967998	0.977165	0.979081	0.976634	0.987664	0.972872	0.971759	0.968443	0.974030	0.983684	0.975228	0.974705	0.972653	0.973038	0.970512	0.970908	0.977611	0.982148	0.971569	0.975193	0.973239	0.976046	0.984435	0.976563	0.980028	0.980577
NorCap-U00-215	0.981223	0.974191	0.972479	0.971577	0.981009	0.985281	0.976828	0.978104	0.974730	0.972929	0.980465	0.980828	0.963276	0.973440	0.982590	0.984699	0.978966	0.983226	0.965584	0.987304	0.988959	0.981953	0.963924	0.965334	0.972542	0.973734	0.966980	0.982049	0.974784	0.961328	0.963886	0.965155	0.970961	0.959770	0.960505	0.962619	0.966274	0.958952	0.965059	0.965642	0.961907	0.969835	0.977869	0.964271	0.977355	0.989691	0.971122	0.966981	0.980209
NorCap-U01-1195	0.978076	0.969937	0.969320	0.974358	0.984652	0.982835	0.970924	0.975826	0.972571	0.967208	0.982097	0.979427	0.972605	0.974039	0.975423	0.983675	0.977751	0.978229	0.974002	0.984377	0.984997	0.970798	0.961035	0.971055	0.975789	0.977403	0.970935	0.982332	0.976208	0.964837	0.959051	0.964071	0.972075	0.960265	0.962634	0.953058	0.958168	0.961818	0.964841	0.975186	0.970750	0.971091	0.970507	0.966151	0.973921	0.983074	0.974910	0.975128	0.980078
NorCap-U01-1196	0.983365	0.984453	0.991396	0.986568	0.985208	0.984457	0.980437	0.987275	0.988553	0.980856	0.989807	0.986061	0.978296	0.985994	0.985024	0.983139	0.985360	0.980984	0.980712	0.992622	0.985358	0.977350	0.977634	0.982892	0.979791	0.982953	0.987314	0.989571	0.986031	0.971407	0.980217	0.976854	0.977896	0.979204	0.979210	0.979091	0.979762	0.979483	0.984444	0.978606	0.971833	0.975780	0.984810	0.968247	0.983410	0.991796	0.985118	0.968403	0.993315
NorCap-U01-1204	0.987477	0.987676	0.991746	0.986960	0.985774	0.988941	0.992233	0.983969	0.990757	0.981794	0.988712	0.985772	0.982564	0.984327	0.989578	0.986346	0.987981	0.986822	0.980588	0.996099	0.986852	0.983860	0.984462	0.980624	0.989941	0.986169	0.984625	0.988414	0.990645	0.978832	0.979519	0.983489	0.979511	0.974111	0.980443	0.982444	0.980182	0.984490	0.983551	0.986431	0.981047	0.981582	0.985190	0.981986	0.980500	0.991640	0.981158	0.980023	0.991896
NorCap-U01-1208	0.984095	0.968939	0.980384	0.978785	0.986091	0.981807	0.978372	0.981864	0.972553	0.975357	0.980422	0.971833	0.979203	0.969351	0.980703	0.984535	0.981013	0.977952	0.975341	0.982659	0.988130	0.980353	0.972203	0.967044	0.972125	0.982824	0.981843	0.984709	0.975999	0.970240	0.956574	0.967179	0.971764	0.969643	0.973670	0.966011	0.970831	0.972418	0.971192	0.978809	0.977378	0.958169	0.966875	0.972272	0.976802	0.983502	0.976958	0.982604	0.968994
NorCap-U01-1607	0.983592	0.978311	0.987200	0.980188	0.987373	0.986051	0.982270	0.985601	0.986797	0.981984	0.989572	0.986432	0.982945	0.986791	0.985239	0.984900	0.983554	0.980115	0.981917	0.992476	0.989341	0.981240	0.985355	0.981639	0.973180	0.986314	0.988765	0.987619	0.986181	0.978225	0.966489	0.981360	0.975546	0.975805	0.977157	0.977538	0.978948	0.981326	0.982005	0.974255	0.976147	0.977822	0.988568	0.978833	0.984079	0.987233	0.975546	0.974585	0.982044
NorCap-U01-1615	0.982385	0.975979	0.978859	0.973533	0.979382	0.979149	0.973239	0.970951	0.977381	0.975367	0.980428	0.978287	0.965928	0.979544	0.975447	0.984945	0.978159	0.977251	0.967796	0.989486	0.986680	0.977375	0.970779	0.975949	0.978819	0.984469	0.978322	0.985854	0.978939	0.956747	0.964299	0.969415	0.980468	0.963845	0.966344	0.966505	0.963038	0.967340	0.969003	0.974195	0.968202	0.978236	0.983305	0.966250	0.975770	0.985596	0.972497	0.961710	0.977146
NorCap-U99-355	0.977320	0.974214	0.970631	0.967539	0.975005	0.984334	0.973096	0.974892	0.969594	0.964512	0.978663	0.979365	0.960879	0.968393	0.985431	0.982251	0.976195	0.971323	0.959182	0.981086	0.982321	0.978845	0.963169	0.970359	0.975075	0.968021	0.969171	0.977143	0.976864	0.950624	0.956965	0.965417	0.971523	0.956909	0.961877	0.956693	0.959235	0.961275	0.957082	0.965196	0.961967	0.963082	0.974908	0.959843	0.972566	0.983851	0.969867	0.978357	0.973227
NorCap-U99-370	0.984569	0.984772	0.988069	0.985054	0.992092	0.983532	0.979390	0.985707	0.981393	0.987707	0.984284	0.983226	0.979854	0.986099	0.986957	0.988360	0.983044	0.982154	0.977063	0.991397	0.991173	0.985954	0.975443	0.976432	0.984835	0.979905	0.984652	0.987755	0.983339	0.971358	0.977345	0.983405	0.981815	0.974350	0.979767	0.979686	0.973743	0.979870	0.984946	0.979894	0.983382	0.977917	0.979492	0.973176	0.977561	0.988073	0.974586	0.976399	0.978396
[truncated: 14 more columns]
